## 1 **Title**

2 Bacteriome diversity of blackflies gut and association with *Onchocerca volvulus*, the causative  
3 agent of onchocerciasis in Mbam valley (Center Region, Cameroon)

4

## 5 **Short Title**

6 Blackflies gut bacteriome exploration

7

## 8 **Authors and Affiliations**

9 Arnould Efon-Ekangou<sup>1,2,3</sup>, Hugues Nana-Djeunga<sup>1,4,\*</sup>, Guilhem Sempere<sup>2</sup>, Joseph  
10 Kamgno<sup>1,5</sup>, Flobert Njiokou<sup>4</sup>, Paul Moundipa-Fewou<sup>3</sup> and Anne Geiger<sup>1,2,4</sup>

11

12 <sup>1</sup>Centre for Research on Filariasis and other Tropical Diseases (CRFilMT), Yaoundé,  
13 Cameroon. <sup>2</sup>INTERTRYP, *Institut de Recherche pour le Développement (IRD)*, University of  
14 Montpellier, Montpellier, France. <sup>3</sup>Department of Biochemistry, Faculty of Sciences,  
15 University of Yaoundé I, Yaoundé, Cameroon. <sup>4</sup>Department of Animal Biology and  
16 Physiology, Faculty of Sciences, University of Yaoundé I, Yaoundé, Cameroon. <sup>5</sup>Faculty of  
17 Medicine and Biomedical Sciences, University of Yaoundé I, Yaoundé, Cameroon.

18

19 \*Correspondence: Email: [nanadjeunga@crfilmt.org](mailto:nanadjeunga@crfilmt.org); Tel.: +237 699 07 64 99. Mailing address:  
20 PO Box 5797, Yaoundé, Cameroon.

21

## 22 **Abstract**

23 **Background:** Vector control using larvicides is the main alternative strategy to address limits  
24 of preventive chemotherapy using ivermectin to fight onchocerciasis. However, it remains

25 substantially limited by implementation difficulties, ecological concerns and resistance of  
26 vector populations. Therefore, efficient and environmentally safe alternative control strategies  
27 are still needed. This study explores the role of blackfly bacterial communities both on vector  
28 competence and refractoriness to *O. volvulus* infection in order to determine their potential as  
29 a novel vector control-based approach to fight onchocerciasis.

30

31 **Principal findings:** A total of 1,270 blackflies were dissected and the infection rate was 10.1%,  
32 indicative of ongoing transmission of onchocerciasis in the surveyed communities. Sequencing  
33 process revealed 19 phyla and 210 genera, highlighting the diversity of gut blackflies bacterial  
34 communities. *Wolbachia* was the predominant genus with 70% of relative abundance of  
35 blackflies gut bacterial communities. *Serratia sp* and *Acidomonas* genera were significantly  
36 abundant among infected blackflies ( $p=0.043$  and  $p=0.027$ , respectively), whereas other genera  
37 as *Brevibacterium* were associated with the absence of infection ( $p=0.008$ ).

38

39 **Conclusion/Significance:** This study revealed that blackfly native bacteria are potentially  
40 involved in infection by *O. volvulus*, either by facilitating or preventing the parasite infestation  
41 of the vector. These bacteria represent an interesting potential as a biological target for a novel  
42 approach of vector control to fight onchocerciasis.

43

44 **Keywords:** onchocerciasis, blackfly, *Onchocerca volvulus*, bacteriome, next generation  
45 sequencing

46

## 47 **Author summary**

48 Studies of arthropods involved in vector-borne diseases (tsetse flies, mosquitoes, and  
49 drosophila) demonstrated the importance of their native bacteria either to ease infection and

50 transmission of human pathogenic microorganisms including parasites or on the contrary to  
51 induce host protective effects against these parasites. Indeed, some native bacteria of arthropod  
52 vectors are now recognized to be associated either with the resistance of their hosts to parasitic  
53 infections, or the reduction of their host's viability in case of the parasite infestation, thus  
54 highlighting the potential of such bacteria to be used as biological tool for vector control  
55 strategies. However, such bacteria have never been described on blackfly, an arthropod  
56 transmitting *Onchocerca volvulus*, which is the parasite responsible of onchocerciasis  
57 commonly known as river blindness. This study aimed to fill this gap by investigating the  
58 bacterial diversity of blackfly bacteriome and describing the possible role of bacteria  
59 communities in susceptibility/resistance features of the blackflies to *O. volvulus* infection, and  
60 therefore their potential as biological targets or tool for vector control. The screening of these  
61 blackflies' native bacteria during this study, highlighted some bacteria genera of interest with  
62 significant association either with the absence of *O. volvulus* in blackfly or with vector  
63 infection.

64

## 65 **Introduction**

66 Onchocerciasis or river blindness is an infectious disease caused by the parasitic nematode,  
67 *Onchocerca volvulus*. The vector, a blackfly of the genus *Simulium*, is an arthropod that breeds  
68 in the oxygenated waters of fast flowing rivers [1]. Following ingestion of microfilariae by the  
69 vector during its blood meal, the first stage larva penetrates the midgut wall and migrates to the  
70 fly muscles where it molts twice. The third stage larva migrates to the head of the blackfly [1,2]  
71 and penetrates the skin of human, the only known natural vertebrate host of *O. volvulus*, during  
72 a subsequent blood meal. The larvae migrate to the subcutaneous tissue where they form  
73 nodules and reach adult stage, with an average lifespan estimated to 10-15 years [2,3]. After  
74 maturation and mating, adult females will release 200,000 - 400,000 microfilariae per three

75 monthly reproductive cycle for their entire life. Microfilariae may then invade the dermis  
76 causing skin conditions, as well as eye tissues causing various eye lesions (keratitis,  
77 iridocyclitis...) which ultimately result in permanent blindness [4]. Indeed, onchocerciasis is  
78 the second cause of blindness of infectious origin after trachoma [5].

79

80 Approximately 120 million people are at risk of contracting the disease worldwide, and 37  
81 million are believed to be infected [6,7]. Africa has the highest burden of the disease, with 99%  
82 of the infection and 1.49 million disability- adjusted life years (DALYs) annually. It has been  
83 reported to be significantly associated with, epilepsy [8,9] and excess mortality [10,11] among  
84 people living in endemic areas.

85

86 Ivermectin, the only safe and effective anthelmintic with microfilaricidal effect on *O. volvulus*,  
87 was registered for the control of onchocerciasis in 1987 [12,13]. Preventive chemotherapies  
88 through the community-directed treatment with ivermectin (CDTI) strategy led to the  
89 interruption of the transmission of the disease in four of the six onchocerciasis foci in Latin  
90 America [14,15]. However, despite almost three decades of preventive chemotherapy in Africa,  
91 onchocerciasis remains a public health problem in many countries, including Cameroon [6,16].  
92 Indeed, recent epidemiological surveys carried out between 2011 and 2015, revealed the  
93 persistence of onchocerciasis with microfilarial prevalence higher than 60% in certain foci in  
94 the Centre, Littoral and West Regions despite more than two decades of CDTI [6,16]. The  
95 reasons related to this situation appear to be multifactorial, including (i) high proportion of  
96 permanent non-compliant infected persons living in endemic areas [17,18] (ii) foci located in  
97 conflict and hard to reach zones [12], (iii) sub-optimal responses of *Onchocerca volvulus* to  
98 ivermectin [19-22] (iv) very high transmission levels due to high densities of black flies with

99 important vector competence [23]. These factors constitute tremendous obstacles to the process  
100 of elimination of the disease [20,24].

101

102 In order to accelerate the interruption of transmission process, various complements or  
103 alternatives to the classical CDTI approach, so-called alternative/complementary treatment  
104 strategies, have been considered, including vector control [25-27]. However, the classical  
105 vector control approach based on the weekly use of larvicides, either aerial or ground  
106 larviciding in blackflies infested breeding sites, remains limited by the implementation  
107 difficulties, the significant risks of ecological pollution and fairly substantial implementation  
108 costs [26] and foci specificities constraints related to the geography and the size of rivers which  
109 are substantially important [17,28]. Also, re-colonization of blackflies after treatment of  
110 breeding sites has been observed in some foci.

111

112 These vector control difficulties being shared by other vector-borne diseases, mitigation or  
113 alternative approaches are likely to be the same. Previous studies in other vectors (tsetse flies,  
114 mosquitoes, and *Drosophila*) demonstrated the impact of their microbiome in the vector  
115 competence, as well as their promising role as effective tools/targets for new generations of  
116 vector control strategies [29-31]. It is now well known that certain native bacteria species such  
117 as *Wigglesworthia glossinidia* an obligate intracellular bacteria of tsetse intestinal cells, are  
118 necessary for the survival of their host [32,33]; While some bacteria are associated with the  
119 refractory character of their hosts to parasitic infection, others are associated with the reduction  
120 of the viability of their hosts in case of the parasite infestation. This evidence is observed with  
121 *Serratia mascesens* which produces a trypanolytic compound preventing the establishment of  
122 *Trypanosoma cruzi* in the digestive tract of *Rhodnius prolixus* [33,34], although other *Serratia*  
123 species have been associated with the reduction of *Anopheles* infection by *Plasmodium* [35].

124

125 Hence, native bacteria of vectors can be targeted and/or manipulated in different ways for vector  
126 control, notably as chemotherapeutic target, immunological reinforcement or cytoplasmic  
127 incompatibility, by inducing through genetic manipulation, a disturbance of molecular  
128 interactions between the parasite and vector host [31,36]. The prerequisite for the development  
129 of such vector control approach is the identification and the characterization of native bacterial  
130 communities of the targeted vector and the assessment of their potential as effective tool/target  
131 for vector control. Thus, the discovery of such bacteria in blackflies would constitute a major  
132 breakthrough and will open wide avenues for the development of an innovative approach in the  
133 fight against onchocerciasis in Africa through the development of non-infestable blackflies.  
134 Hence, this study was designed to screen the whole bacterial communities of blackfly gut and  
135 highlight bacterial species associated with vector competence and those associated with vector  
136 refractoriness to *O. volvulus* infection and thus assess their possible impact on onchocerciasis  
137 transmission.

138

## 139 **Methods**

### 140 **Ethics approval and consent to participate**

141 Although this study did not directly involve human subjects, sample (capture of blackflies) were  
142 collected using the human landing collection technique which require volunteers. Hence, an  
143 ethical clearance was obtained from the Centre Regional Ethics Committee for Human Health  
144 Research (N°1011/CRERSH/C/2020) and administrative authorizations were granted by the  
145 Centre Regional Delegate for Public Health and the Bafia District Medical Officer. Prior to the  
146 beginning of the entomological survey, the objectives and schedules of the study were explained  
147 to all the volunteers. Participation was entirely voluntary and each of them (aged 24 years and  
148 above) was free to opt out without fear of retaliation. The volunteers recruited lived in sampling

149 sites, so they were not more exposed to fly bites than usual. Moreover, volunteers were trained  
150 to capture flies before being bitten. Finally, ivermectin was provided as preventive  
151 chemotherapy against onchocerciasis.

152

### 153 **Study area**

154 This study was carried out in the Bafia health district, situated in Mbam and Inoubou Division,  
155 Centre Region, Cameroon. This health district is known for its historical endemicity to  
156 onchocerciasis and disease persistence despite two decades of ivermectin-based preventive  
157 chemotherapy. Communities of this health district are mainly watered by the Mbam River and  
158 its tributaries whose falls and rapids promote and maintain throughout the year blackfly  
159 breeding sites. The phytogeography of this area shows a forest/savannah transition zone  
160 dominated by a peri-forest savannah with forest galleries along the rivers and important  
161 breeding sites favorable to the development of blackflies. Bafia is mainly dominated by the  
162 subequatorial climate with average temperature of 23.5°C and bimodal rainfall regime marked  
163 by modest precipitations with average rainfall of 831.7 mm. Socio-economic activities are  
164 dominated by sand extraction in the Mbam river, as well as agriculture and trade on the shores  
165 of the latter.

166

### 167 **Capture, dissection and preservation of blackflies**

168 Entomological surveys were conducted on April 2019 in three communities of the Bafia health  
169 district, namely Bayomen (04° 51'52"N; 011° 06'07"E), Biatsota (04° 41'11"N; 011° 17'28"E)  
170 and Nyamongo (04° 46'57"N; 011° 17'24"E). In each selected site, blackflies were captured  
171 using the "human Landing collection" method. Indeed, catches were made up by two groups of  
172 volunteers, the first working from 8 a.m. until 1 p.m. and the second from 1 p.m. until 5 p.m.  
173 Only female blackflies, which are hematophagous, landed on exposed legs of well-trained

174 community volunteers, and captured before having time to take their blood meal. Captured  
175 blackflies were individually dissected in situ for parity, under sterile conditions using a  
176 binocular magnifier. For each identified parous blackfly, gut, thorax, head and feet were  
177 separated and transferred individually into well labelled 1.5 mL Eppendorf tube containing 70°  
178 Ethanol and stored at -20°C for further molecular analysis.

179

### 180 **DNA extraction and *O. volvulus* PCR amplification**

181 Genomic DNA was extracted from separated parts of fly (head, thorax, gut and feet) and  
182 purified on MiniElute PCR purification columns using the QIAamp DNA Mini kit (Qiagen Inc.,  
183 Les Ulis, France) and eluted in 50 µL molecular biology-grade water. DNA samples from  
184 thorax and feet were stored for further purposes. DNA extracted from gut and head samples  
185 were used for the detection of *O. volvulus* by quantitative PCR (qPCR) using specific primers  
186 (Forward: 5'-GCTATTGGTAGGGGTTTGCAT-3' and reverse: 5'-  
187 CCACGATAATCCTGTTGACCA-3') targeting a DNA portion (128bp) of ND5 *O. volvulus*  
188 gene and probe (5'-FAM-TAAGAGGTTAAGATGG NFQ-3'). Each well of the microtiter  
189 plate (MicroAmp fast optical 96-well reaction plate, Applied Biosystems) was filled with 20  
190 µL of final solution, containing 2 µL DNA template and 18 µL of PCR master mix made up of:  
191 12 µL molecular biology-grade water, 2 µL of 10× PCR buffer, 2.4 µL 50× MgCl<sub>2</sub> (50 mM),  
192 0.1 µL dNTPs (10 mM), 0.6 µL forward primer (10 mM), 0.6 µL reverse primer (10 mM), 0.2  
193 µL ND5 *O. volvulus* probe, and 0.1 µL HotStarq polymerase (5 U/µL). For each amplification  
194 process, negative and positive controls were used to ensure good interpretation of final results.  
195 Real-time PCR assays were performed on an Applied Biosystems Step One Plus real-time PCR  
196 machine (Applied Biosystems, Foster City, CA, USA) using the following cycling conditions:  
197 Initial denaturation at 95°C for 10 min, followed by 45 cycles, each including a denaturation  
198 step at 95°C for 1min, an annealing and elongation step at 60.1°C during 30s.



199

## 200 **High throughput sequencing and Meta-barcoding analysis**

201 The 16S rRNA gene V3-V4 variable region was amplified using specific primers designed in  
202 the scope of a previous study [33] to assess the bacterial communities of blackfly guts using the  
203 Illumina MiSeq sequencing approach (MR DNA Laboratory,  
204 <http://www.mrdnlab.com/shallowater>, USA). PCR was performed using the HotStar Taq Plus  
205 Master Mix Kit (Qiagen Inc, Texas, USA) under the following conditions: 94°C for 3 min for  
206 initial denaturation, followed by 30 cycles of successive steps: denaturation at 94°C for 30 s,  
207 annealing at 53°C for 40 s and elongation at 72°C for 1 minute, and a final elongation step at  
208 72°C for 5 min. After amplification, PCR products were checked on 2% agarose gel to  
209 determine the success of amplification and the relative intensity of bands. Multiple PCR  
210 products were pooled together in same proportions based on their molecular weight and DNA  
211 concentrations. Pooled PCR products were purified using calibrated Ampure XP beads (Details  
212 on Manufacturer). Then the pooled and purified PCR product were used to prepare Illumina  
213 DNA library. Sequencing process was performed at MR DNA ([www.mrdnlab.com](http://www.mrdnlab.com),  
214 Shallowater, TX, USA) using a MiSeq following the manufacturer's guidelines.

215

216 Prior to running the metabarcoding pipeline, a specific reference file for the assignment step  
217 was generated. This was achieved by running CutAdapt v1.8  
218 (<http://dx.doi.org/10.14806/ej.17.1.200>) with those primers to extract V3-V4 reference  
219 sequences from the SILVA SSU database (release 132). The generated sequences were  
220 deposited in the EMBL-EBI (Study accession number: PRJEB38276; secondary study  
221 accession number: ERP121684).

222

223 The first stage in the workflow consisted in filtering read quality using CutAdapt with a  
224 threshold value of 20. Then, VSearch v2.14 (<https://dx.doi.org/10.7717%2Fpeerj.2584>) was  
225 used in combination with CutAdapt for the following series of tasks: (1) merging the forward  
226 and reverse reads of each sample; (ii) demultiplexing to obtain one fastq file per sample; (iii)  
227 clipping barcodes and primers; (iv) excluding sequences containing unknown bases; (v)  
228 calculating expected error rate; and (vi) performing sample-level dereplication. The remaining  
229 sequences were then pooled into a single FASTA file to allow VSearch to carry out a global  
230 dereplication, after which clustering was applied to remaining sequences using Swarm v2.2.2  
231 (<https://dx.doi.org/10.7717%2Fpeerj.1420>). VSearch was then used again to identify chimeric  
232 clusters.

233

234 The STAMPA (<https://github.com/frederic-mahe/stampa>) pipeline was then run for taxonomic  
235 assignment of representative OTU sequences based on the contents of the specific reference file  
236 generated from SILVA SSU records. This generated an OTU table to which the following filters  
237 were applied in order to retain targeted taxa at genus level: elimination of clusters with a high  
238 expected error ( $>0.0002$ ), elimination of small clusters (less than 3 sequences) observed in a  
239 single sample.

240

241 Data obtained after analysis of raw data from sequencing have been analyzed using Calypso  
242 8.1 (<https://dx.doi.org/10.1093%2Fbioinformatics%2Fbtw725>), an online software dedicated  
243 to bacterial taxonomic analysis. Rarefaction curves assessing the sequencing depth of each  
244 sample were performed prior to quantitative (assessing alpha and beta diversity) and  
245 comparative analyses between infected and uninfected flies, and sampling sites. Significant  
246 differences in bacterial richness between infected and uninfected flies, and between the three

247 sampling sites were tested using nonparametric Kruskal-Wallis test with threshold of  
248 significance set at  $\alpha=0.05$ .

249

## 250 **Results**

### 251 **Blackflies infection by *Onchocerca volvulus***

252 From the 1,270 blackflies caught and dissected, a total of 207 (16.3%) were parous and analyzed  
253 for infection (Table 1). Overall, 21 (10.1%) blackfly guts were infected with *O. volvulus*. The  
254 infection rate was capture site dependent. Indeed, Biatsota displayed the highest infection rate  
255 (13.0%), followed by Bayomen (8.8%) and Nyamongo (6.8%), though the difference was not  
256 statistically significant. On DNA samples from blackfly heads, only 5 samples were confirmed  
257 positive to *O. volvulus* detection, with an infectivity rate of 2.4%, and differences in infectious  
258 blackflies distribution among geographic areas was not significant.

259

260 **Table 1. Distribution of collected blackflies according to geographic origin.**

| <b>Geographic origin</b> | <b>No. Dissected flies</b> | <b>No. Parous flies</b> | <b>No. dissected flies with <i>O. volvulus</i> (%)</b> | <b>No. parous flies with <i>O. volvulus</i> (%)</b> |
|--------------------------|----------------------------|-------------------------|--------------------------------------------------------|-----------------------------------------------------|
| Bayomen                  | 200                        | 34                      | 3 (1.5)                                                | 3 (8.8)                                             |
| Biatsota                 | 558                        | 100                     | 13 (2.3)                                               | 13 (13.0)                                           |
| Nyamongo                 | 512                        | 73                      | 5 (1.0)                                                | 5 (6.8)                                             |
| <b>Total</b>             | <b>1270</b>                | <b>207</b>              | <b>21 (1.7)</b>                                        | <b>21 (10.1)</b>                                    |

261 No.: number of; *O. volvulus*: *Onchocerca volvulus*

262

### 263 **Sequencing data analysis**

264 DNA from 42 blackflies (21 infected and 21 randomly chosen among uninfected), were selected  
265 for sequencing. Sequencing of 16S rDNA from total DNA extracted from blackflies intestine

266 using Illumina sequencing technology generated a total of 3,427,049 high quality sequence  
267 reads across the V3-V4 region. The average number of tags per sample for the V3-V4 region  
268 was 81,596 (ranging from 11,351 to 136,972 per sample), with read length varying from 300 to  
269 400 nucleotides. The sequencing depth was performed to assess how well sequence data  
270 represent the diversity of the studied microbial communities. Consequently, a rarefaction curve  
271 (Fig 1) showed the saturation of most of them between 60,000 and 100,000 reads, indicating  
272 that the mean sequencing effort was sufficient to characterize almost all the OTUs. Nonetheless,  
273 some samples showed poorly amplified OTUs, in particular the reference samples AP10, AN40  
274 and AN35.

275

## 276 **Taxonomic Assignment**

277 The taxonomic assignment of OTUs sequences allowed to identify 23 phyla among which 22  
278 belonged to the Bacteria kingdom and only one belongs to *Archaea* (*Euryarchaeota* phylum).  
279 For further analysis, we removed rare taxa by excluding those presenting with less than 0.01%  
280 of relative abundance across all samples and those present in less than 10% of sequenced  
281 samples to exclude potential contaminants. Using these filters, a total of 19 phyla were found  
282 fulfilling stated criteria and retained for further investigations. Among retained phyla,  
283 *Proteobacteria*, *Unclassified bacteria* and *firmicutes* represented the most predominant  
284 Bacteria phyla with 44.7%, 15.4% and 9.6% of mean relative abundance across the 42 samples,  
285 respectively. *Proteobacteria* was the most important phylum (>90%) in 22 out of 42 samples.  
286 This was confirmed by the heat map (Fig 2) showing the distribution of the mean relative  
287 abundance of the 19 retained phyla, and highlighting the predominance of *Proteobacteria*,  
288 significantly found in almost all samples. Other phyla were unevenly distributed and abundant  
289 among the different samples. In fact, *Caldiserica*, *Kiritimatiellaeota*, and *Thermotogae* were  
290 the less represented phyla among the analyzed samples, found only in four samples with non-

291 significant relative abundance within all samples. NoHit phylum represents taxonomic  
292 description whose sequences do not fit with any OTU listed in the databases. The hierarchical  
293 clustering of phyla relative abundance distinctly shows three clusters namely cluster A  
294 including samples from AP15 to AN29, cluster B from AP11 to AN24 and cluster C from AN27  
295 to AN34. Moreover, cluster B, made up of three sub-trees was organized in two distinct groups  
296 based on the distribution of *Firmicutes*, *Actinobacteria* and *Bacteroidetes* which were  
297 substantially abundant in cluster B1 (AN16 to AN24) than in cluster B2 (AP11 to AN38). The  
298 clustering does not however match with specific condition, either geographic or infection status.  
299

### 300 **Bacterial genera**

301 A total of 554 bacterial genera was observed, with relative abundance ranging from 6.58619E-  
302 05% to 70.16%. Likewise phyla analysis, we excluded bacterial genera with relative abundance  
303 lower than 0.01%, and those present in less than 10% of samples to exclude potential  
304 contaminants, and a total of 210 genera were thus retained for further analysis.

305  
306 Twenty bacterial species were shown to be systematically present in all samples with various  
307 relative abundance. The bacterial taxa could possibly represent the blackfly gut core microbiota.  
308 A heat map analysis (Fig 3) showed that the hierarchical clustering of the bacterial relative  
309 abundance of these 20 bacterial genera across the 42 samples resulted in a poorly structured  
310 tree. Only *Wolbachia* was distinctly separated from the other genera of which abundance was  
311 unevenly distributed among the samples. However, the map shows a slight contrast on these  
312 bacterial distribution with a more uniform color print at the right half of the heat map. This  
313 observation was strengthened by the hierarchical clustering of the samples on the basis of the  
314 relative abundance of considered bacterial genera, which allowed discriminating two main  
315 clusters: cluster 1 including samples AP17 to AN23, and cluster 2 including AP16 to AN31

316 (Cluster's indicative are shown on Fig 3). However, the samples of either cluster 1 or cluster 2  
317 seem to be associated neither with sample infection status nor with sample geographic origin.  
318 The hierarchical clustering of bacteria genera based on blackflies and infection status and  
319 geographic area where they were captured, showed no specific bacterial clustering. However,  
320 *Wolbachia* genus showed a relative homogeneity of abundance distribution from samples AP16  
321 to AN31. This observation matches with the cluster 2 identified in the preceding hierarchical  
322 clustering description (S1 Table).

323

324 The most prominent bacteria was the genus *Wolbachia* with 70.16% of relative abundance (1.3  
325 and 94.1% of relative abundance among samples) (Fig 4A), followed by *Gluconobacter* and  
326 *Acinetobacter* genera, with 4.0% (0.1 and 46.8) and 3.5% (0.2 and 59.5) of relative richness  
327 among OTUs, respectively. The less abundant bacterial genera were *Gemmatirosa* and  
328 *Modestobacter*, with a relative richness of 0.0102 and 0.01, respectively. This relative  
329 abundance distribution, largely occulted by *Wolbachia* genus, is substantially modified after  
330 exclusion of this genus, with the evidence of other bacterial genera (Fig 4B).

331

### 332 **Association between blackflies' bacterial diversity with either their infection status or** 333 **geographical origin**

334 We investigated the potential relationship between the bacterial diversity of blackflies gut, with  
335 either the infection status or geographical origin by estimating the  $\alpha$ -diversity using Shannon  
336 Index which measures overall diversity, including both the number of OTUs and their evenness.  
337 No significantly differences were observed both on bacterial diversity and richness regarding  
338 the geographical origin ( $p = 0.387$ ) (Fig 5A) and the infection status (infected vs. non-infected)  
339 of sampled blackflies ( $p = 0.349$ ) (Fig 5B).

340

341 **Multivariate association between bacterial diversity in blackflies, infection status and**  
342 **geographical origin**

343 The investigation of potential relationships between the tripartite factors: structure of gut  
344 bacterial communities of blackflies, their geographical origin (Bayomen, Biatsota and  
345 Nyamongo) and their infection status (infected vs. uninfected) was done to highlight potential  
346 complex associations between gut blackfly bacterial composition and the two other covariates.  
347 A hierarchical clustering using the Bray–Curtis index did not discriminate unambiguously the  
348 different groups with regard to sample origins or infection status (Fig 6). However, it showed a  
349 structure quite similar (symmetrical from the point of view of the layout) to the one on heat  
350 map (Fig 3), with 2 main clusters, cluster I from A24 to AP8 and cluster II from AN35 to AP17.  
351 The composition of cluster I is identical to the one of cluster 2 with two "curious" exceptions:  
352 the position of the sample AN29 is completely isolated in this tree while it was previously  
353 integrated in cluster 2, and sample AN24 previously located in cluster 1 (Fig 3) has shifted to  
354 cluster I now accounting for 30 samples.

355

356 **Research of biomarker according to blackfly infection status**

357 In order to determine potential biomarker(s) of bacterial community associated to specific  
358 geographical community and status infected/uninfected of sampled blackflies, we performed  
359 richness analysis of each bacterial genus in different conditions. This analysis that included the  
360 100 most abundant bacterial genera within our samples using feature selection method (S1 Fig),  
361 allowed to identify five bacterial genera significantly associated to infected status, notably  
362 *Cyanothece\_PCC7424* (p=0.032), *Serratia* (p=0.043), *Acidomonas* (p=0.027), *Roseamomas*  
363 (p=0.035) and *Cnuella* (p=0.046), whereas four bacterial genera were significantly associated  
364 to uninfected status, notably, *Sanguibacter* (p=0.048), *Fructobacillus* (p=0.00044),  
365 *Micrococcus*(p=0.034) and *Brevibacterium* (p=0.0087).

366

## 367 **Discussion**

368 This study aiming to characterize the whole bacterial communities within the blackflies gut and  
369 the assessment of their potential associations with vector competence is, to our knowledge, a  
370 pioneer in onchocerciasis. Nonetheless, this approach based on successful outcomes of parallel  
371 studies on other vector-borne diseases is a fundamental prerequisite for application of vector  
372 control strategy-based on modified non-infestable blackflies to gradually reduce disease  
373 transmission in onchocerciasis endemic areas.

374

375 The global infestation rate was 10% in Bafia health district, suggesting that onchocerciasis  
376 transmission is still ongoing in this historical endemic area despite almost three decades of  
377 community-directed treatment with ivermectin (CDTI). Our results confirm previous evidences  
378 supportive of ongoing transmission both within the human population (microfilarial prevalence  
379 varying from 24.4 to 57.0 %) [6] and in vector population (>98% of infection detected in  
380 blackflies using pool screening approach) [37]. The level of endemicity in surveyed  
381 communities of Bafia health district is related to their proximity with Mbam River,  
382 characterized by series of rapids and well oxygenated water that provide ideal breeding sites  
383 for blackfly. This observations are supportive of the importance of vector control approach in  
384 the process of elimination of onchocerciasis [27,38].

385

386 According to both infestation and infectivity rates, Biatsota was considered as the most active  
387 community in terms of disease transmission; this situation is likely to be related to its  
388 geographical situation which is closer to Mbam River (first line community) as compared to  
389 other surveyed communities. Moreover, in this community, economic activities are more  
390 intense along the river, thus increasing the biting rate in contrast to Bayomen and Nyamongo



391 communities where inhabitants are living less closely to the river, hence contact with blackflies  
392 are less important.

393

394 In this study, taxonomic assignation allowed to identify a total 19 phyla and 210 genera (the  
395 most relevant with relative richness >0.01% and present in >10% samples). This result  
396 highlights the diversity of gut blackflies bacterial communities, which seems significantly  
397 larger than bacterial diversity reported in many recent studies on other arthropods of medical  
398 importance such as tsetse fly and *Aedes*. Indeed, studies on tsetse fly, using the same molecular  
399 approach showed that the gut bacteria communities were made up of 14 phyla and 83 different  
400 bacteria genera [32,33], meanwhile sequencing of 16S rRNA sequences in *Aedes* (vector of  
401 Dengue virus) using 453 pyrosequencing technique showed they were made up of six phyla of  
402 bacteria [39].

403

404 Our findings revealed that *Proteobacteria* was the predominant phylum with 77.1% of mean  
405 relative abundance. This predominant phylum common to several insects [32,33,36,40], plays  
406 a major role in energy management [41]. *Wolbachia* was the most important bacterial genus  
407 with 70.2% of mean relative abundance of blackflies gut bacterial communities. This result is  
408 in agreement with previous estimates suggesting that *Wolbachia* infects more than 65% of all  
409 insect species [42], though they are also widespread and common in other invertebrates such as  
410 arachnids, crustaceans, and nematodes [43,44]. Beyond their presence and their likely role in  
411 vector biology, *Wolbachia* also plays an important role in the development and pathogenesis of  
412 the main filarial parasites (*Onchocerca volvulus*, *Brugia malayi*, *Mansonella perstans* and  
413 *Wuchereria bancrofti*) [43,45,46] except *Loa loa* [47,48].

414

415 The analysis of bacterial taxa from blackflies gut did not show significant differences in  
416 bacterial composition on blackflies originating from the three surveyed communities. This  
417 could be explained by the fact that the three selected communities Bayomen, Bioatsota and  
418 Nyamongo are located in the same geographical area (Bafia health district), within~50 km and  
419 hence share both the same bio-ecological (climate, flora) and environmental features. This  
420 observations was similar to those recorded on *Anopheles* [49] where no significant differences  
421 between the bacterial flora of the mosquitoes collected in similar ecological features foci in  
422 Cameroon. Such evidence was also observed with tsetse flies [32,33], demonstrating that  
423 bacterial composition of flies collected in Campo and Bipindi, two foci sharing similar  
424 ecological features, were not significantly different. In the line of these studies, vector  
425 populations from distinct geographical area with different eco-climatic features are expected to  
426 share significantly different bacterial communities. Such possibility was evidenced by Askoy  
427 et al [50] who reported differences in bacterial composition between distinct populations of  
428 tsetse flies transmitting *Trypanosoma rhodesiense*. However, differences could not be  
429 exclusively associated to the ecological differences of surveyed foci, but also with tsetse species  
430 (*G. fuscipes fuscipes*, *G. morsitans morsitans* and *G. pallidipes*) that are commonly found in  
431 different biotic and abiotic habitats. In this frame, even though *Simulium damnosum* complex  
432 is known as the important vector for *O. volvulus* in Cameroon [37,51,52], *S. yahense* and *S.*  
433 *squamosum* are associated with forest and forest-savannah transitional zones [37,52]. Further  
434 studies should be conducted on *Simulium* genetics of these localities to ensure if the highlighted  
435 homogeneity of bacterial communities within captured blackflies are shared by a common  
436 *Simulium* species or if there are different *Simulium* species with similar bacterial communities.  
437  
438 Similarly, the analysis of the abundance diversity of the 20 bacteria genera hosted by all the  
439 selected flies showed no significant differences, between *O. volvulus* infected or uninfected,

440 blackflies. The possibility that some bacteria genera escaped molecular characterization may  
441 be considered. Indeed, results of the rarefaction curves allowed to expect almost all the OTUs  
442 to be characterized. However, if so, one may expect missing bacteria, if any, to be present in  
443 very low abundance. Besides, the overwhelming presence of the genus *Wolbachia* could lower  
444 the efficiency of amplification process of low abundant or rare bacteria genera with potential  
445 biological implications.

446

447 Nevertheless, when the 100 most represented genera (S1 Fig) are considered (which are not  
448 hosted by all the 42 selected flies), a significant association between the abundance of some of  
449 them (*Serratia*, *Acidomonas*, *Roseamomas* and *Cnuella*, *cyanothece\_PCC7424*) and blackflies  
450 infection was evidenced. These bacteria potentially improve the susceptibility of blackflies to  
451 *Onchocerca volvulus* infection. Presently, only *Serratia* species has been described in other  
452 vector [32,34,53] and his role seems to be vector-dependent. In Mosquitoes, *Serratia odorifera*  
453 has been associated with the susceptibility of *Aedes aegypti* both to chikungunya virus [54] and  
454 dengue virus [55]. Meanwhile, other studies demonstrated the ability of *Serratia marcescens* to  
455 produce some trypanolytic compounds that increase the refractoriness of *Rhodnius prolixus* to  
456 *T. cruzi* infection [34]. Further investigations are therefore needed to identify *Serratia* species  
457 on blackflies, decipher the host-bacteria interactions as well as to assess whether the biological  
458 role is mediated by single bacteria species or by the whole significantly associated bacteria  
459 genera. These evidences illustrate the complexity of molecular interaction with biological  
460 impact on vector susceptibility or refractoriness to parasite infection according to the bacterial  
461 species. Besides, other bacteria genera, in particular *Brevibacterium*, were found significantly  
462 associated with the absence of infection among blackflies. This gram-negative bacterium was  
463 not yet reported to play a biological role in any vector-borne disease, thus opening a potential  
464 research avenue with possible outcome of interest.

465

466 In addition to these questions about the possible association between intestinal bacteria and the  
467 susceptibility / resistance of blackflies to infection with *O. volvulus*, a supplementary question  
468 is arising from the structure of the hierarchical clustering shown in Figs 3 and 6. The 42 samples  
469 are clearly distributed into two clusters that neither the geographic origin nor the infection  
470 status, can explain. Considering all these samples are coming from blackflies belonging to the  
471 same species (*Simulium damnosum complex*), one cannot incriminate a possible differentiation  
472 related to a species difference. The simple observation on the heat map highlights contrast in  
473 colors intensity which represents differences in abundance of the various bacteria and allows to  
474 discriminate the two clusters; this is even more evident when we consider *Wolbachia*. Hence,  
475 existence within the vector population, of a genetic diversity (existence of different genotypes)  
476 could be at the origin of the observed structuration. Thus it appears necessary to explore, besides  
477 the possible involvement of intestinal bacteria in blackflies infection, such an hypothesis in  
478 further investigation in order to get a better insight into the complex interactions between the  
479 three partners, the blackfly, its intestinal bacteria and the parasite that are together responsible  
480 for the transmission of onchocerciasis.

481

## 482 **Conclusion**

483 This study exploring the blackfly bacteriome is to our knowledge a pioneer on onchocerciasis  
484 vector. It revealed that some bacteria genera are associated with the presence of *O. volvulus* in  
485 blackflies while others are refractory to it, giving an insight of biomarkers with interesting  
486 potential as biological tool/target for developing of non-infestable blackflies. However, this  
487 study had some limitations in such as vector speciation of analyzed blackflies as well as  
488 sequence depth that needed to be improve in some samples.

489

## 490 **Acknowledgements**

491 The authors are thankful to Dr Philippe Nwane, M. André Domche and Mrs Guindoline  
492 Kweban for their valuable contributions during blackfly collection and dissection in the field,  
493 as well as to the human landing collection operators for their willingness to participate in this  
494 study. The authors are also grateful to Dr Jean Marc Tsagmo and M. François Sougal Ngambia  
495 Freitas for their guidance during bioinformatic analyses of data.

496

## 497 **References**

- 498 1. Takaoka H (2015) 5) Review of the Biology and Ecology of Adult Blackflies in Relation to  
499 the Transmission of Onchocerciasis in Guatemala. *Trop Med Health* 43: 71-85.
- 500 2. Plaisier AP, Oortmarsen GJv, Remme J, Habbema JDF (1991) The reproductive lifespan of  
501 *Onchocerca volvulus* in West African savanna. *Acta Tropica*, 48(1991)271-284.
- 502 3. Basanez MG, Boussinesq M (1999) Population biology of human onchocerciasis. Royal  
503 society.
- 504 4. Udall DN (2007) Recent Updates on Onchocerciasis: Diagnosis and Treatment. *Clinical*  
505 *Infectious Diseases* 44:53–60.
- 506 5. Resnikoff S, Keys TU (2012) Future trends in global blindness. *Indian J Ophthalmol* 60: 387-  
507 395.
- 508 6. Kamga GR, Dissak-Delon FN, Nana-Djeunga HC, Biholong BD, Mbigha-Ghogomu S, et al.  
509 (2016) Still mesoendemic onchocerciasis in two Cameroonian community-directed  
510 treatment with ivermectin projects despite more than 15 years of mass treatment. *Parasit*  
511 *Vectors* 9: 581.
- 512 7. Honorat GM Zouré MN, Afework H Tekle, Uche V Amazigo, Peter J Diggle, Emanuele  
513 Giorgi and Jan HF Remme (2014) The geographic distribution of onchocerciasis in the  
514 20 participating countries of the African Programme for Onchocerciasis Control: (2) pre-  
515 control endemicity levels and estimated number infected. *Parasites & Vectors* 7:326.
- 516 8. Siewe Fodjo JN, Mandro M, Mukendi D, Tepage F, Menon S, et al. (2019) Onchocerciasis-  
517 associated epilepsy in the Democratic Republic of Congo: Clinical description and  
518 relationship with microfilarial density. *PLoS Negl Trop Dis* 13: e0007300.
- 519 9. Colebunders R, Njamnshi AK, van Oijen M, Mukendi D, Kashama JM, et al. (2017)  
520 Onchocerciasis-associated epilepsy: From recent epidemiological and clinical findings to  
521 policy implications. *Epilepsia Open* 2: 145-152.

- 522 10. Walker M, Little MP, Wagner KS, Soumbeay-Alley EW, Boatman BA, et al. (2012) Density-  
523 dependent mortality of the human host in onchocerciasis: relationships between  
524 microfilarial load and excess mortality. *PLoS Negl Trop Dis* 6: e1578.
- 525 11. Little MP, Breitling LP, Basáñez MG, Alley ES, Boatman BA (2004) Association between  
526 microfilarial load and excess mortality in onchocerciasis: an epidemiological study. *The*  
527 *Lancet* 363: 1514-1521.
- 528 12. Colebunders R, Basanez MG, Siling K, Post RJ, Rotsaert A, et al. (2018) From river  
529 blindness control to elimination: bridge over troubled water. *Infect Dis Poverty* 7: 21.
- 530 13. Boussinesq M (2005) Ivermectine. *Tropicale Medicine*
- 531 14. Rodriguez-Perez MA, Fernandez-Santos NA, Orozco-Algarra ME, Rodriguez-Atanacio JA,  
532 Dominguez-Vazquez A, et al. (2015) Elimination of Onchocerciasis from Mexico. *PLoS*  
533 *Negl Trop Dis* 9: e0003922.
- 534 15. Gustavsen K, Hopkins A, Sauerbrey M (2011) Onchocerciasis in the Americas: from arrival  
535 to (near) elimination. *Parasit Vectors* 4: 205.
- 536 16. Afework H, Tekle HGMZ, Mounkaila Noma, Michel Boussinesq, Luc E. Coffeng, Wilma  
537 A. Stolk and Jan H. F. Remme (2016) Progress towards onchocerciasis elimination in the  
538 participating countries of the African Programme for Onchocerciasis Control:  
539 epidemiological evaluation results. *Infectious Diseases of Poverty* 5:66.
- 540 17. Gebrezgaber G, Mekonnen Z, Yewhalaw D, Hailu A (2019) Reaching the last mile: main  
541 challenges relating to and recommendations to accelerate onchocerciasis elimination in  
542 Africa. *Infect Dis Poverty* 8: 60.
- 543 18. Senyonjo L, Fischer PU, Oye J, Bakajika D, Biholong B, et al. (2016) Factors Associated  
544 with Ivermectin Non-Compliance and Its Potential Role in Sustaining *Onchocerca*  
545 *volvulus* Transmission in the West Region of Cameroon. *PLOS Neglected Tropical*  
546 *Diseases* 10: e0004905.
- 547 19. Frempong KK, Walker M, Cheke RA, Tetevi EJ, Gyan ET, et al. (2016) Does Increasing  
548 Treatment Frequency Address Suboptimal Responses to Ivermectin for the Control and  
549 Elimination of River Blindness? *Clin Infect Dis* 62: 1338-1347.
- 550 20. Pion SD, Nana-Djeunga HC, Kamgno J, Tendongfor N, Wanji S, et al. (2013) Dynamics of  
551 *Onchocerca volvulus* microfilarial densities after ivermectin treatment in an ivermectin-  
552 naive and a multiply treated population from Cameroon. *PLoS Negl Trop Dis* 7: e2084.
- 553 21. Osei-Atweneboana MY, Eng JKL, Boakye DA, Gyapong JO, Prichard RK (2007)  
554 Prevalence and intensity of *Onchocerca volvulus* infection and efficacy of ivermectin in  
555 endemic communities in Ghana: a two-phase epidemiological study. *The Lancet* 369:  
556 2021-2029.
- 557 22. Awadzi K, Boakye DA, Edwards G, Opoku NO, Attah SK, et al. (2004) An investigation  
558 of persistent microfilaridermias despite multiple treatments with ivermectin, in two  
559 onchocerciasis-endemic foci in Ghana. *Ann Trop Med Parasitol* 98: 231-249.

- 560 23. Bakajika D, Ngondi JM, Senyonjo L, Enyong P, Oye J, et al. (2018) On-going transmission  
561 of human onchocerciasis in the Massangam health district in the West Region of  
562 Cameroon: Better understanding transmission dynamics to inform changes in  
563 programmatic interventions. PLOS Neglected Tropical Diseases 12: e0006904.
- 564 24. Nana-Djeunga HC, Bourguinat C, Pion SD, Bopda J, Kengne-Ouafo JA, et al. (2014)  
565 Reproductive status of *Onchocerca volvulus* after ivermectin treatment in an ivermectin-  
566 naive and a frequently treated population from Cameroon. PLoS Negl Trop Dis 8: e2824.
- 567 25. Anne L. Wilson, Orin Courtenay, Louise A. Kelly-Hope, Thomas W. Scott, Willem Takken,  
568 et al. (2020) The importance of vector control for the control and elimination of vector-  
569 borne diseases. PLoS Negl Trop Dis 14(1).
- 570 26. Jacob BG, Loum D, Lakwo TL, Katholi CR, Habomugisha P, et al. (2018) Community-  
571 directed vector control to supplement mass drug distribution for onchocerciasis  
572 elimination in the Madi mid-North focus of Northern Uganda. PLoS Negl Trop Dis 12:  
573 e0006702.
- 574 27. Boussinesq M, Fobi G, Kuesel AC (2018) Alternative treatment strategies to accelerate the  
575 elimination of onchocerciasis. Int Health 10: i40-i48.
- 576 28. WHO (2013) Programme for the Elimination of Neglected Diseases in Africa (PENDA).
- 577 29. Kamtchum-Tatuene J, Makepeace BL, Benjamin L, Baylis M, Solomon T (2017) The  
578 potential role of *Wolbachia* in controlling the transmission of emerging human arboviral  
579 infections. Curr Opin Infect Dis 30: 108-116.
- 580 30. Wilke AB, Marrelli MT (2015) Paratransgenesis: a promising new strategy for mosquito  
581 vector control. Parasit Vectors 8: 342.
- 582 31. Gupta J, Shyma K, Ranjan S, Gaur G, Bhushan B (2012) Genetic manipulation of  
583 endosymbionts to control vector and vector borne diseases. Veterinary World 5: 571.
- 584 32. Jean Marc Tsagmo Ngoune JR, Guilhem Sempere, Flobert Njiokou, Trésor T. Melachio,  
585 Luc Abate, Majoline T. Tchioffo and Anne Geiger (2019) The composition and  
586 abundance of bacterial communities residing in the gut of *Glossina palpalis palpalis*  
587 captured in two sites of southern Cameroon. Parasites & Vectors.
- 588 33. Jacob F, Melachio TT, Njitchouang GR, Gimonneau G, Njiokou F, et al. (2017) Intestinal  
589 Bacterial Communities of Trypanosome-Infected and Uninfected *Glossina palpalis*  
590 *palpalis* from Three Human African Trypanomiasis Foci in Cameroon. Front Microbiol  
591 8: 1464.
- 592 34. Azambuja P, Feder D, Garcia ES (2004) Isolation of *Serratia marcescens* in the midgut of  
593 *Rhodnius prolixus*: impact on the establishment of the parasite *Trypanosoma cruzi* in the  
594 vector. Exp Parasitol 107: 89-96.
- 595 35. Bando H, Okado K, Guelbeogo WM, Badolo A, Aonuma H, et al. (2013) Intra-specific  
596 diversity of *Serratia marcescens* in *Anopheles* mosquito midgut defines *Plasmodium*  
597 transmission capacity. Sci Rep 3: 1641.

- 598 36. Caragata EP, Moreira LA (2017) Using an Endosymbiont to Control Mosquito-Transmitted  
599 Disease. 123-142.
- 600 37. Hendy A (2018) Blackfly ecology and *Onchocerca volvulus* transmission in three formerly  
601 hyperendemic foci in Uganda, Tanzania and Cameroon: University of Antwerp.
- 602 38. Cheke RA (2017) Factors affecting onchocerciasis transmission: lessons for infection  
603 control. *Expert Rev Anti Infect Ther* 15: 377-386.
- 604 39. Panpim Thongsripong JAC, Amy B. Green, Pattamaporn Kittayapong, Bruce A. Wilcox,  
605 Durrell D. Kapan, Shannon N. Bennett (2017) Mosquito vector- associated microbiota:  
606 Metabarcoding bacteria and eukaryotic symbionts across habitat types in Thailand  
607 endemic for dengue and other arthropod- borne diseases. *Ecology and Evolution* 8: 1352–  
608 1368.
- 609 40. Correa CC, Ballard JWO (2016) Wolbachia Associations with Insects: Winning or Losing  
610 Against a Master Manipulator. *Frontiers in Ecology and Evolution* 3.
- 611 41. David Emerson, Jeremy A. Rentz, Timothy G. Lilburn, Richard E. Davis, Henry Aldrich,  
612 et al. (2007) A Novel Lineage of Proteobacteria Involved in Formation of Marine Fe-  
613 Oxidizing Microbial Mat Communities *journalpone0000667* 2(8).
- 614 42. Hilgenboecker K, Hammerstein P, Schlattmann P, Telschow A, Werren JH (2008) How  
615 many species are infected with Wolbachia?--A statistical analysis of current data. *FEMS*  
616 *Microbiol Lett* 281: 215-220.
- 617 43. Ahantarig A, Kittayapong P (2011) Endosymbiotic Wolbachia bacteria as biological control  
618 tools of disease vectors and pests. *Journal of Applied Entomology* 135: 479-486.
- 619 44. Werren JH, Zhang W, Guo LR (1995) Evolution and phylogeny of Wolbachia: reproductive  
620 parasites of arthropods. *Proc Biol Sci* 261: 55-63.
- 621 45. Yaya I. Coulibaly, Benoit Dembele, Abdallah A. Diallo, Ettie M. Lipner, Salif S. Doumbia,  
622 et al. (2009) A Randomized Trial of Doxycycline for *Mansonella perstans* Infection. *N*  
623 *Engl J Med* 361:1448-58.
- 624 46. Foster J, Ganatra M, Kama I, Ware J, Makarova K, et al. (2005) The Wolbachia Genome  
625 of *Brugia malayi*: Endosymbiont Evolution within a Human Pathogenic Nematode. *PLoS*  
626 *Bioiogy* 3(4): e121.
- 627 47. Desjardins CA, Cerqueira GC, Goldberg JM, Dunning Hotopp JC, Haas BJ, et al. (2013)  
628 Genomics of *Loa loa*, a Wolbachia-free filarial parasite of humans. *Nat Genet* 45: 495-  
629 500.
- 630 48. Helen F McGarry, Ken Pfarr, Gill Egerton, Achim Hoerauf, Jean-Paul Akue, et al. (2003)  
631 Evidence against Wolbachia symbiosis in *Loa loa*. *filariajournal* 2:9.
- 632 49. Tchioffo MT, Boissiere A, Abate L, Nsango SE, Bayibeki AN, et al. (2015) Dynamics of  
633 Bacterial Community Composition in the Malaria Mosquito's Epithelia. *Front Microbiol*  
634 6: 1500.



- 635 50. Emre Aksoy, Erich L. Telleria, Richard Echodu, Yineng Wu, Loyce M. Okedi, et al. (2014)  
636 Species-Specific Gut Microbiota in Uganda Reveals Limited Diversity and Analysis of  
637 Multiple Tsetse Fly Populations. Applied and Environmental Microbiology.
- 638 51. Adler PH (2019) World blackflies (Diptera: Simuliidae): A comprehensive revision of the  
639 taxonomic and geographical inventory.  
640 <http://www.clemson.edu/cafls/biomia/pdfs/blackflyinventory.pdf>.
- 641 52. M. Traoré-Lamizana, S. Somiari HBM, Vagime CG, Post RG (2001) Sex chromosomes  
642 variation and Cytotaxonomy of onchocerciasis vector simulium squamosum in Cameroon  
643 and Nigeria. Medical and veterinary entomology 15: 221-223.
- 644 53. Pradhan B, Guha D, Naik AK, Banerjee A, Tambat S, et al. (2019) Probiotics *L. acidophilus*  
645 and *B. clausii* Modulate Gut Microbiota in Th1- and Th2-Biased Mice to Ameliorate  
646 Salmonella Typhimurium-Induced Diarrhea. Probiotics Antimicrob Proteins 11: 887-  
647 904.
- 648 54. Apte-Deshpande AD, Paingankar MS, Gokhale MD, Deobagkar DN (2014) *Serratia*  
649 *odorifera* mediated enhancement in susceptibility of *Aedes aegypti* for chikungunya  
650 virus. Indian J Med Res 139(5): : 762-768.
- 651 55. Anjali Apte-Deshpande, Mandar Paingankar, Mangesh D. Gokhale, Deobagkar DN (2012)  
652 *Serratia odorifera* a Midgut Inhabitant of *Aedes aegypti* Mosquito Enhances Its  
653 Susceptibility to Dengue-2 Virus PLoS ONE 7(7): e40401  
654 doi:10.1371/journal.pone.0040401.

655

## 656 **Figure legends**

657 **Fig 1. Rarefaction analysis on the blackfly samples.**

658

659 **Fig 2. Heat map analysis of the distribution and abundance of the bacterial phyla in**  
660 **blackfly gut samples.** Clusters are organized from the left to right: cluster A including samples  
661 from AP15 to AN29, cluster B from including samples AP11 to AN24 and cluster C including  
662 samples from AN27 to AN34. The cluster B is divided into two sub-cluster: Sub-cluster B1  
663 including samples from AN16 to AN24 and sub-cluster B2 including samples from AP11 to  
664 AN38.

665

666 **Fig 3. Heat map analysis of the distribution and abundance of the bacterial genera in**  
667 **blackfly gut samples.** Samples are clustered from left to right: cluster 1 including samples  
668 AP17 to AN23 and cluster 2 including samples AP16 to AN31.

669

670 **Fig 4. Relative abundance of the bacterial genera along the 42 blackflies samples:** (A) All  
671 the 20 bacteria genera including *Wolbachia*. (B) All 19 bacteria genera, without *Wolbachia*  
672 genus.

673

674 **Fig 5. Alpha diversity using Shannon Index assessing the relationship between the**  
675 **bacterial diversity of blackflies gut:** (A) with geographical origin, and (B) with blackfly  
676 infection status. The same non significance has been observed when using other metrics  
677 (evenness, richness and Simpson Index).

678

679 **Fig 6. Bray-Curtis multivariate analysis of bacterial distribution across the 42 selected**  
680 **blackfly intestine samples.** Two mains clusters are highlighted here: cluster I from A24 to AP8  
681 and cluster II from AP35 to AP17

682

## 683 **Supporting information**

684 **S1 Table. Summary of the overall sequencing raw data regarding the 42 blackfly samples.**

685

686 **S1 Fig. Forest plot illustrating the Odd ratio variation of top 100 bacterial genera**  
687 **(biomarker candidates) relative abundance depending on blackflies infection status**  
688 **(uninfected/infected).**

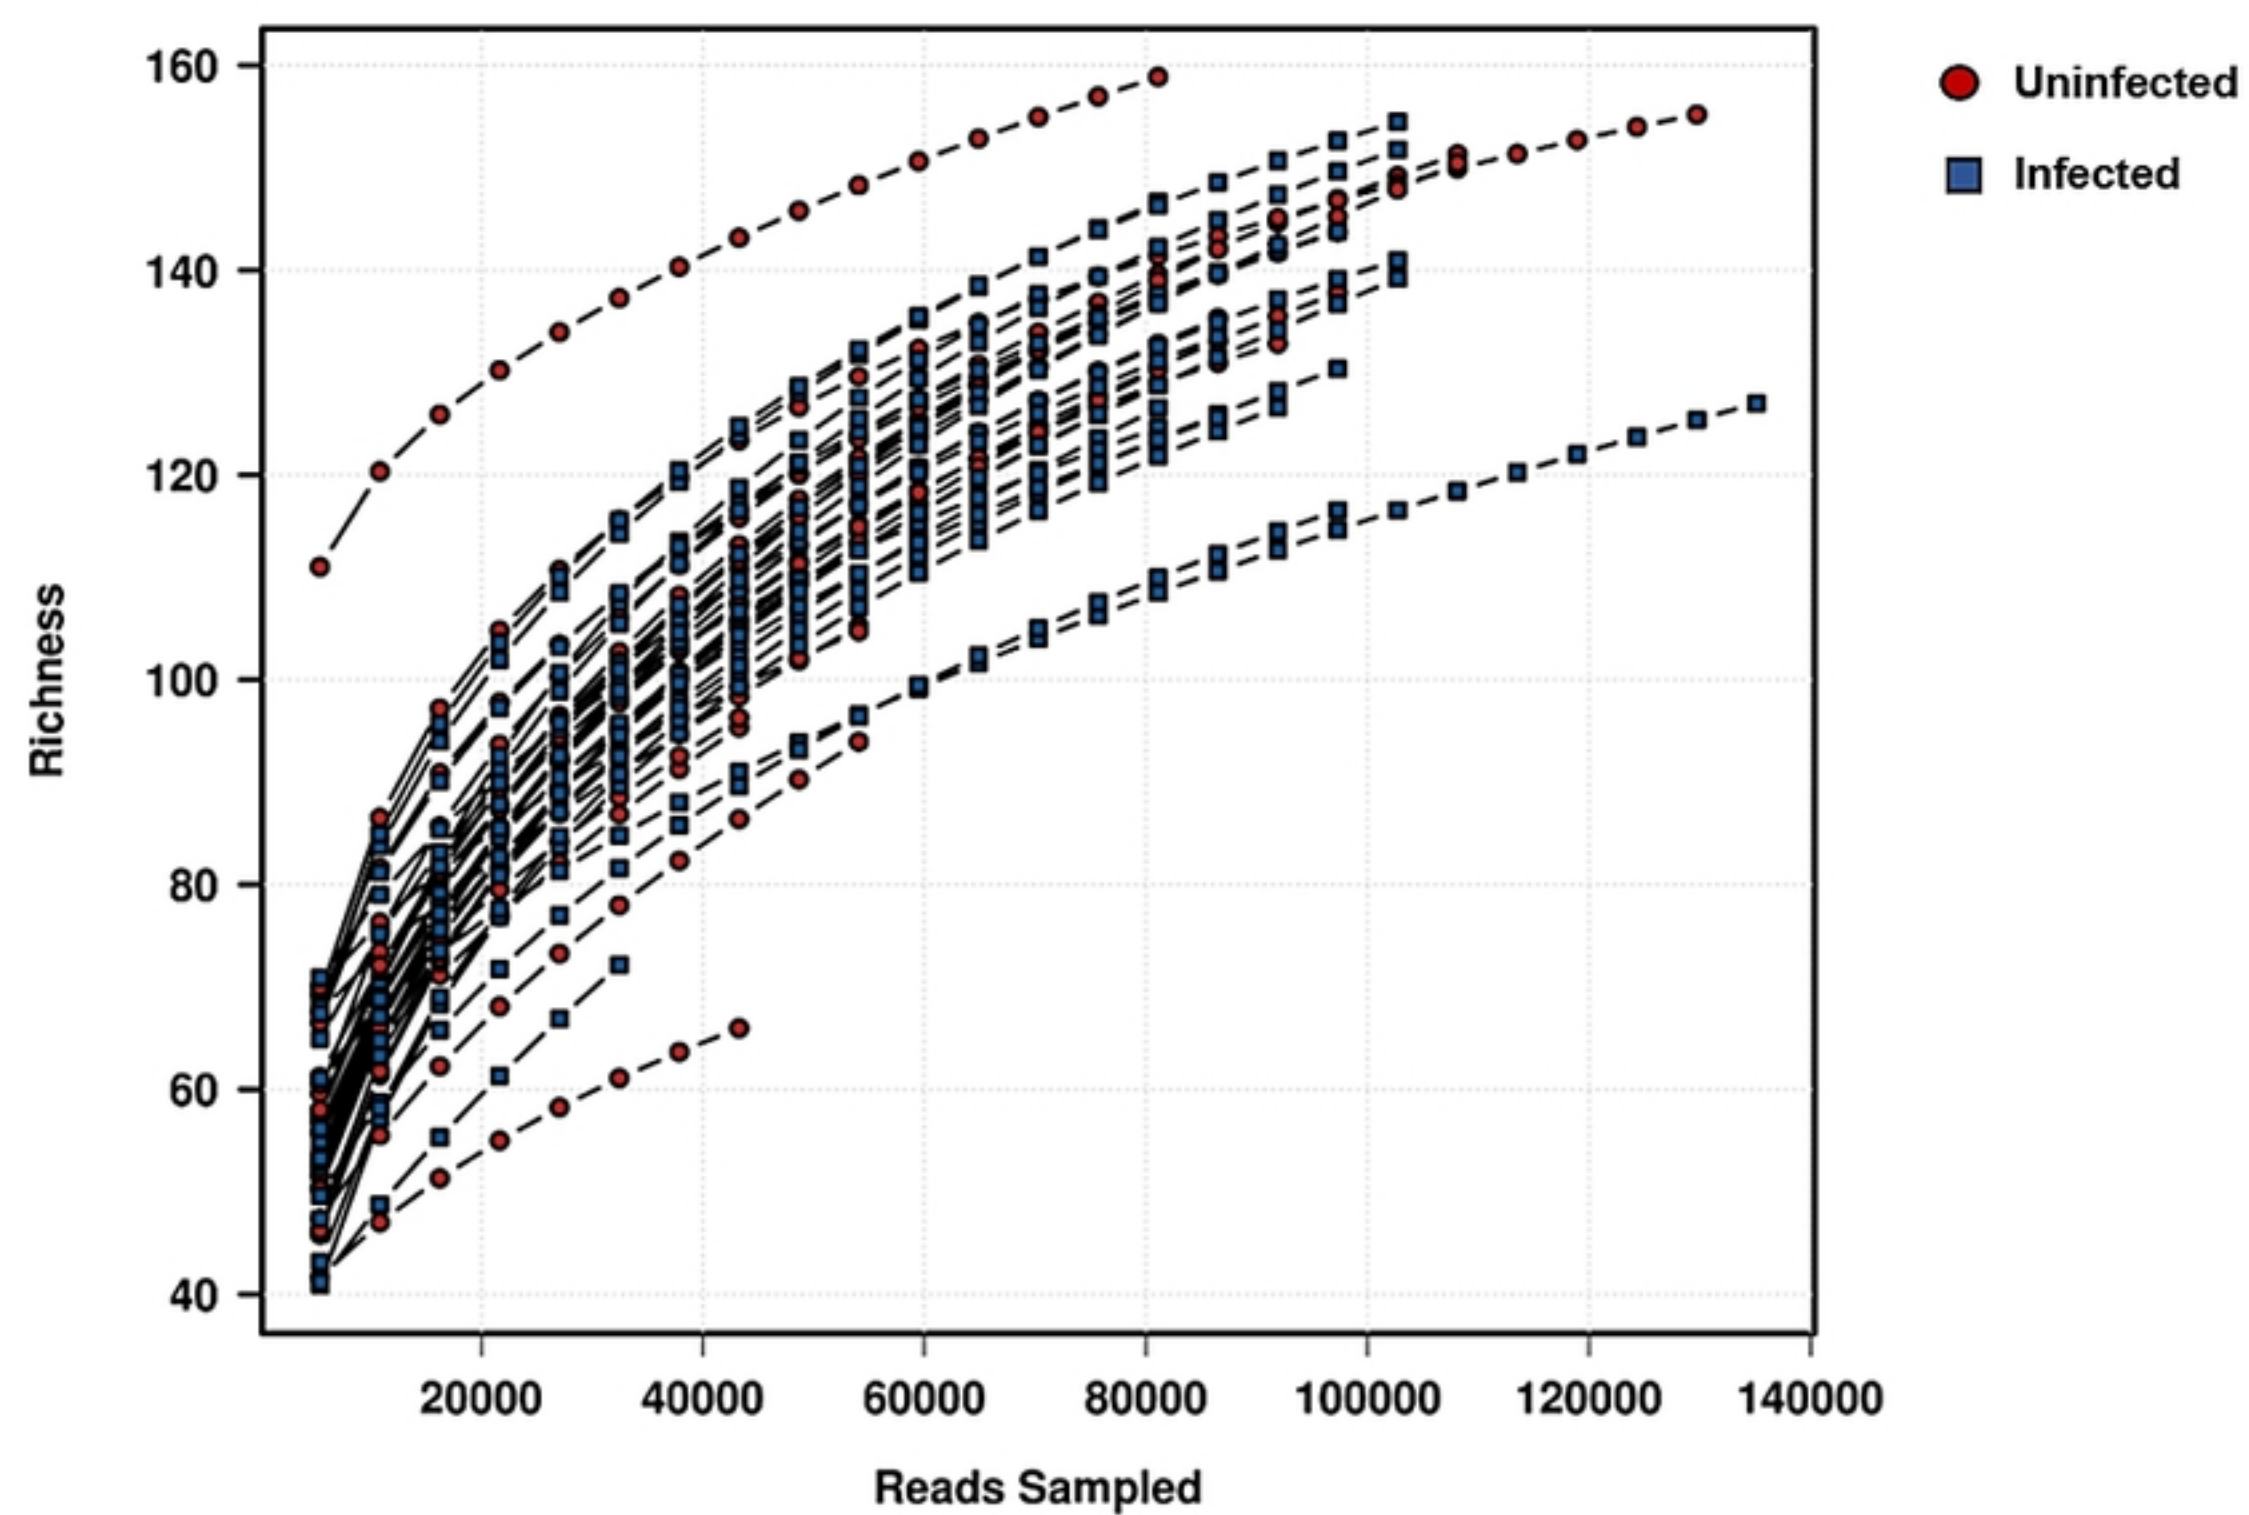

Figure 1

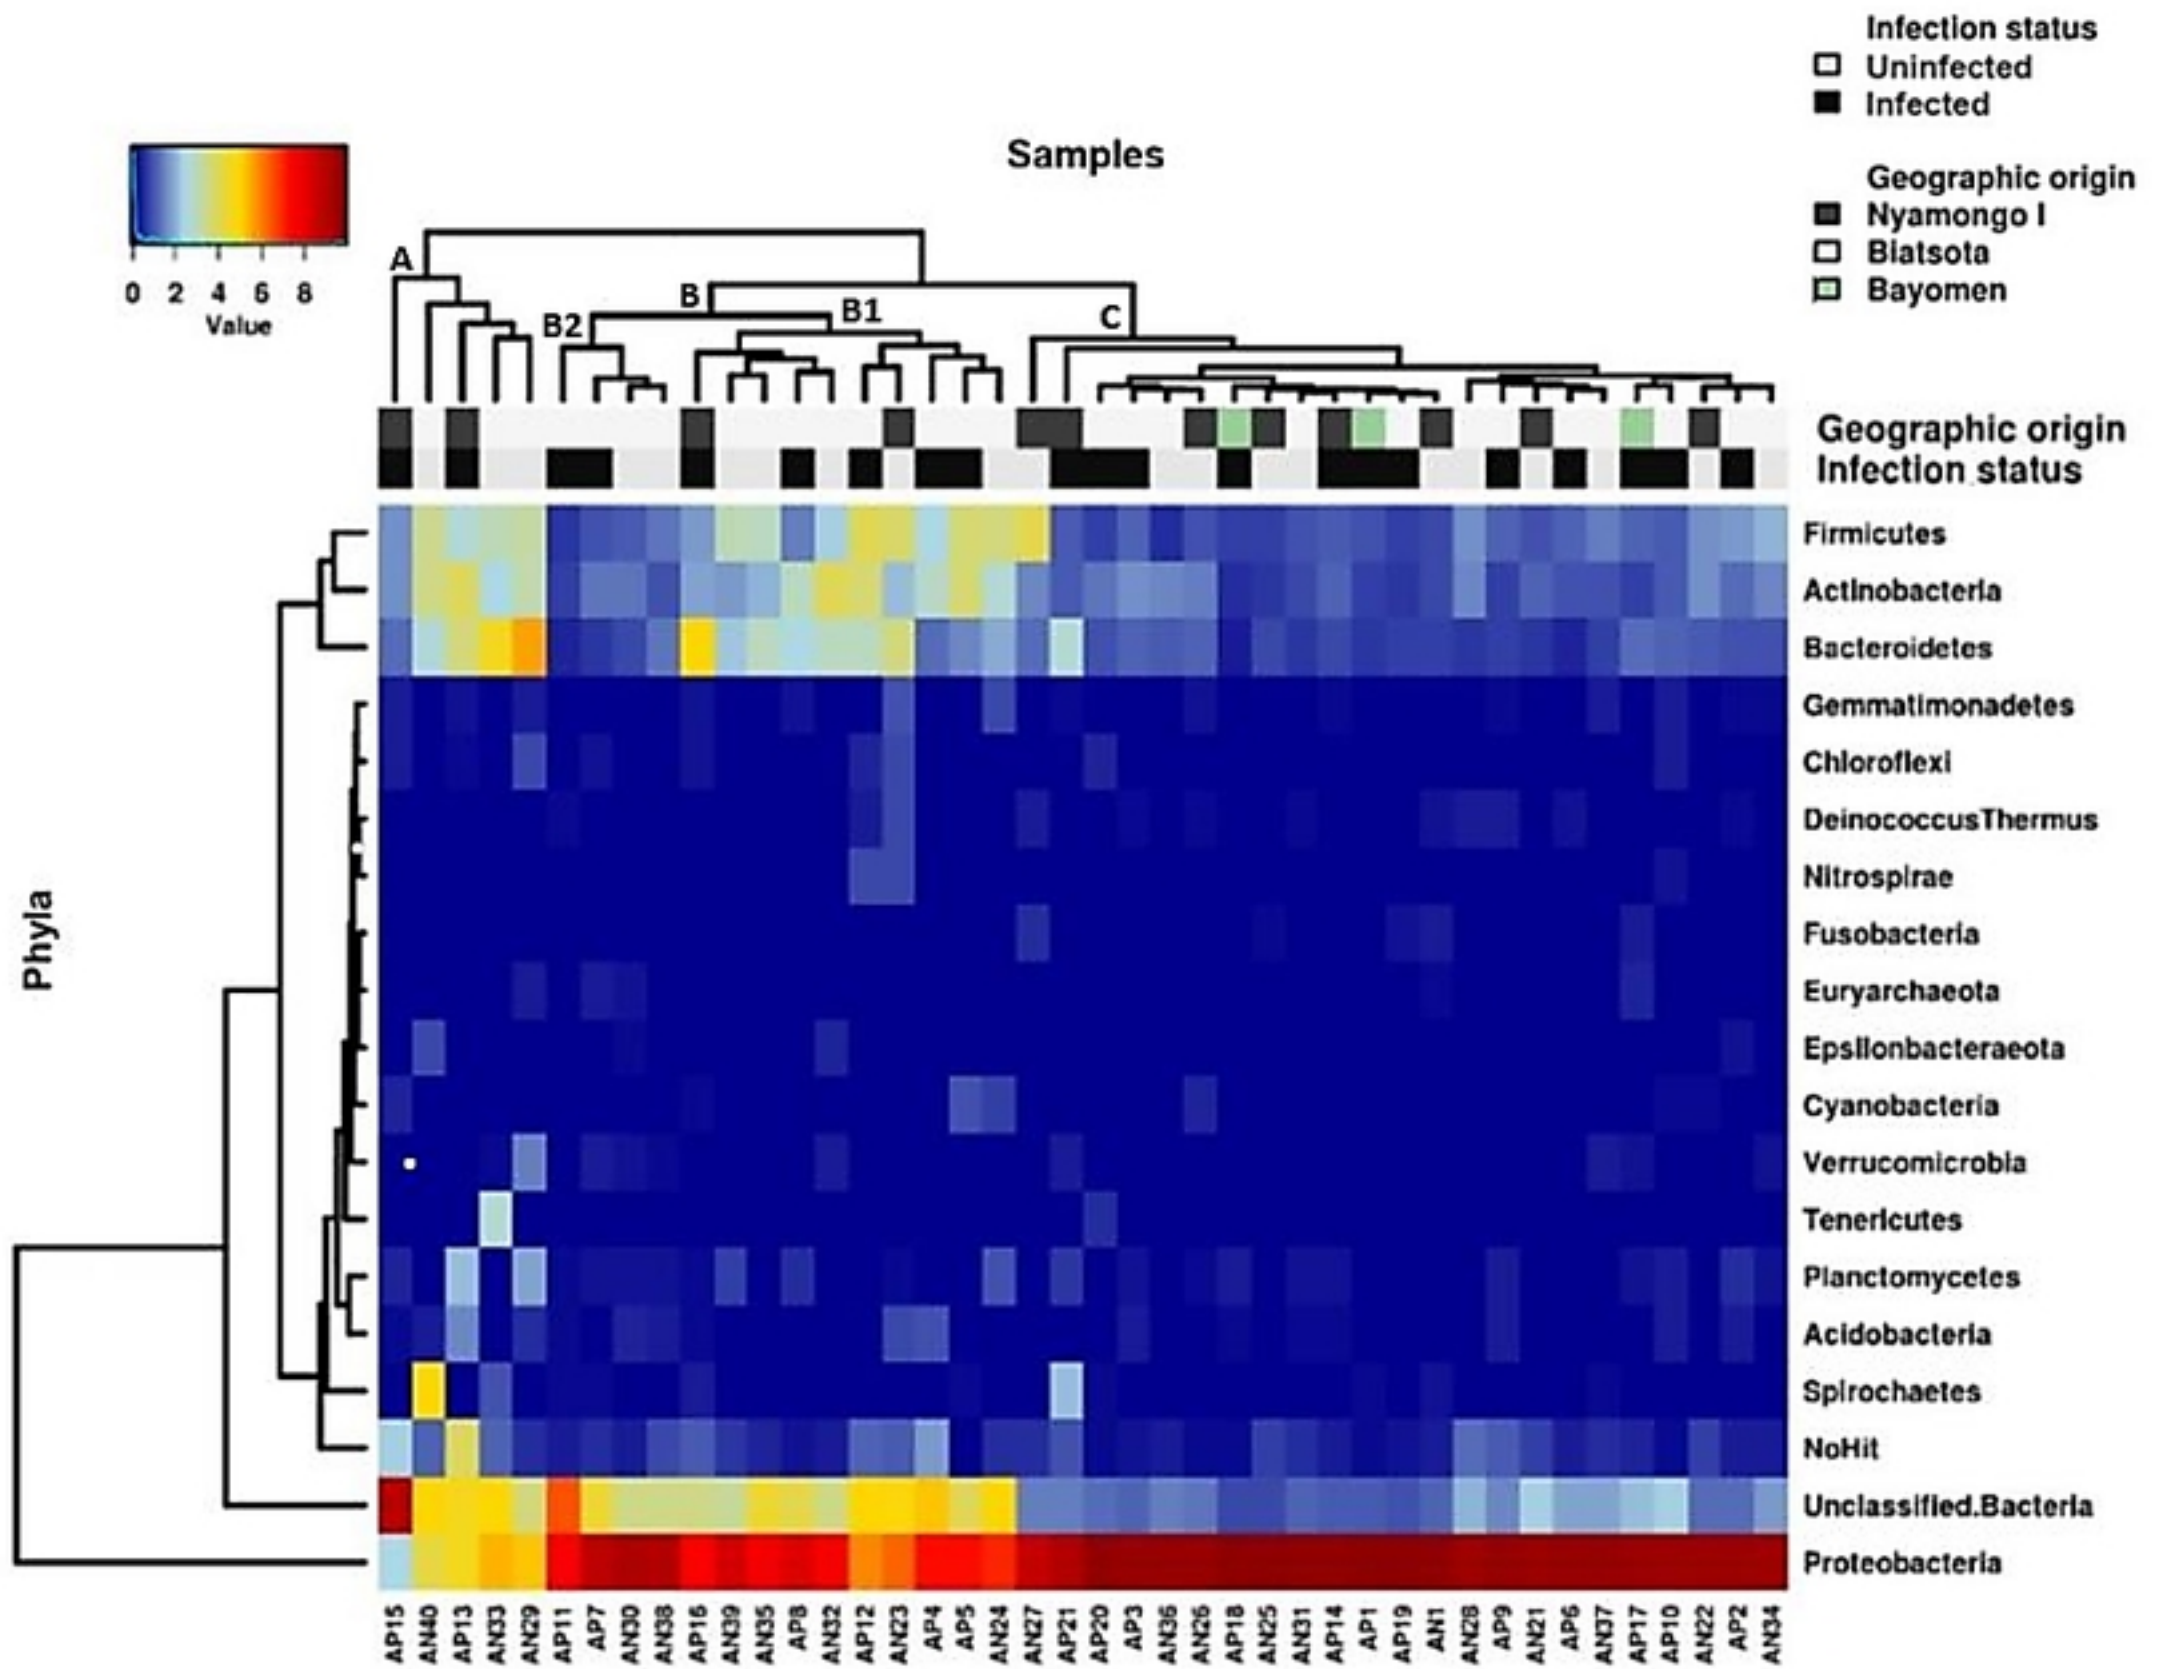

Figure 2

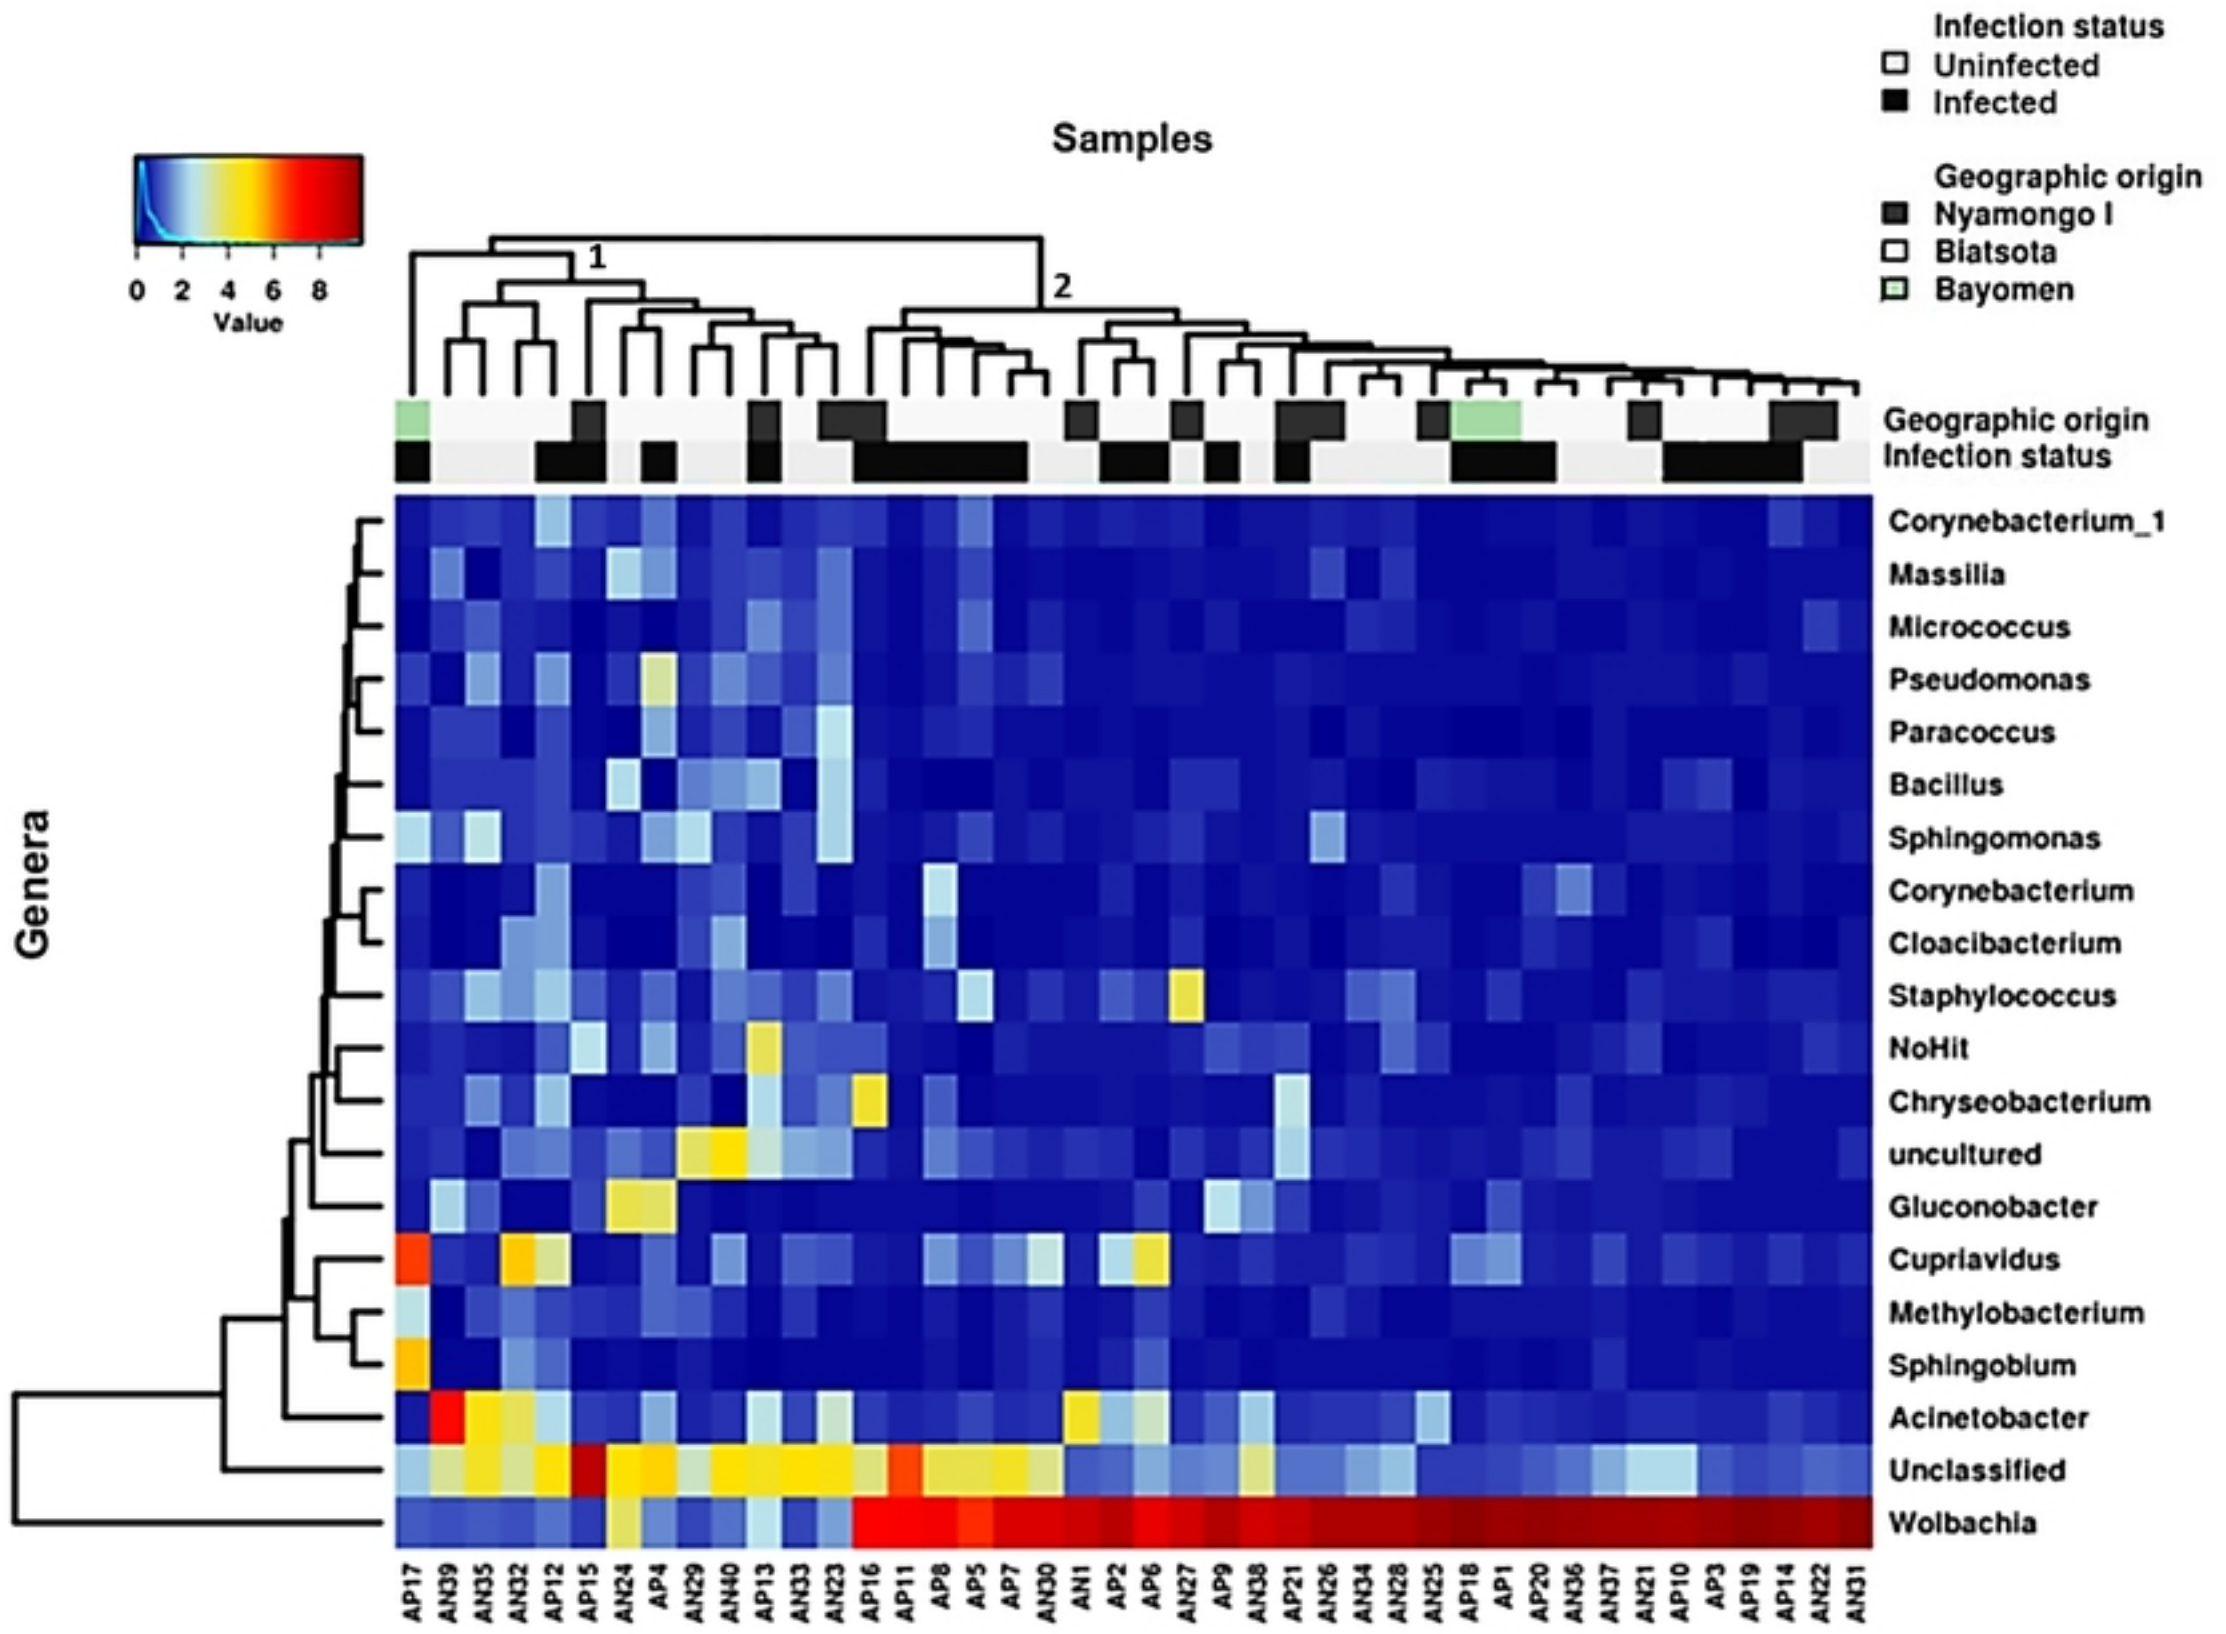

Figure 3

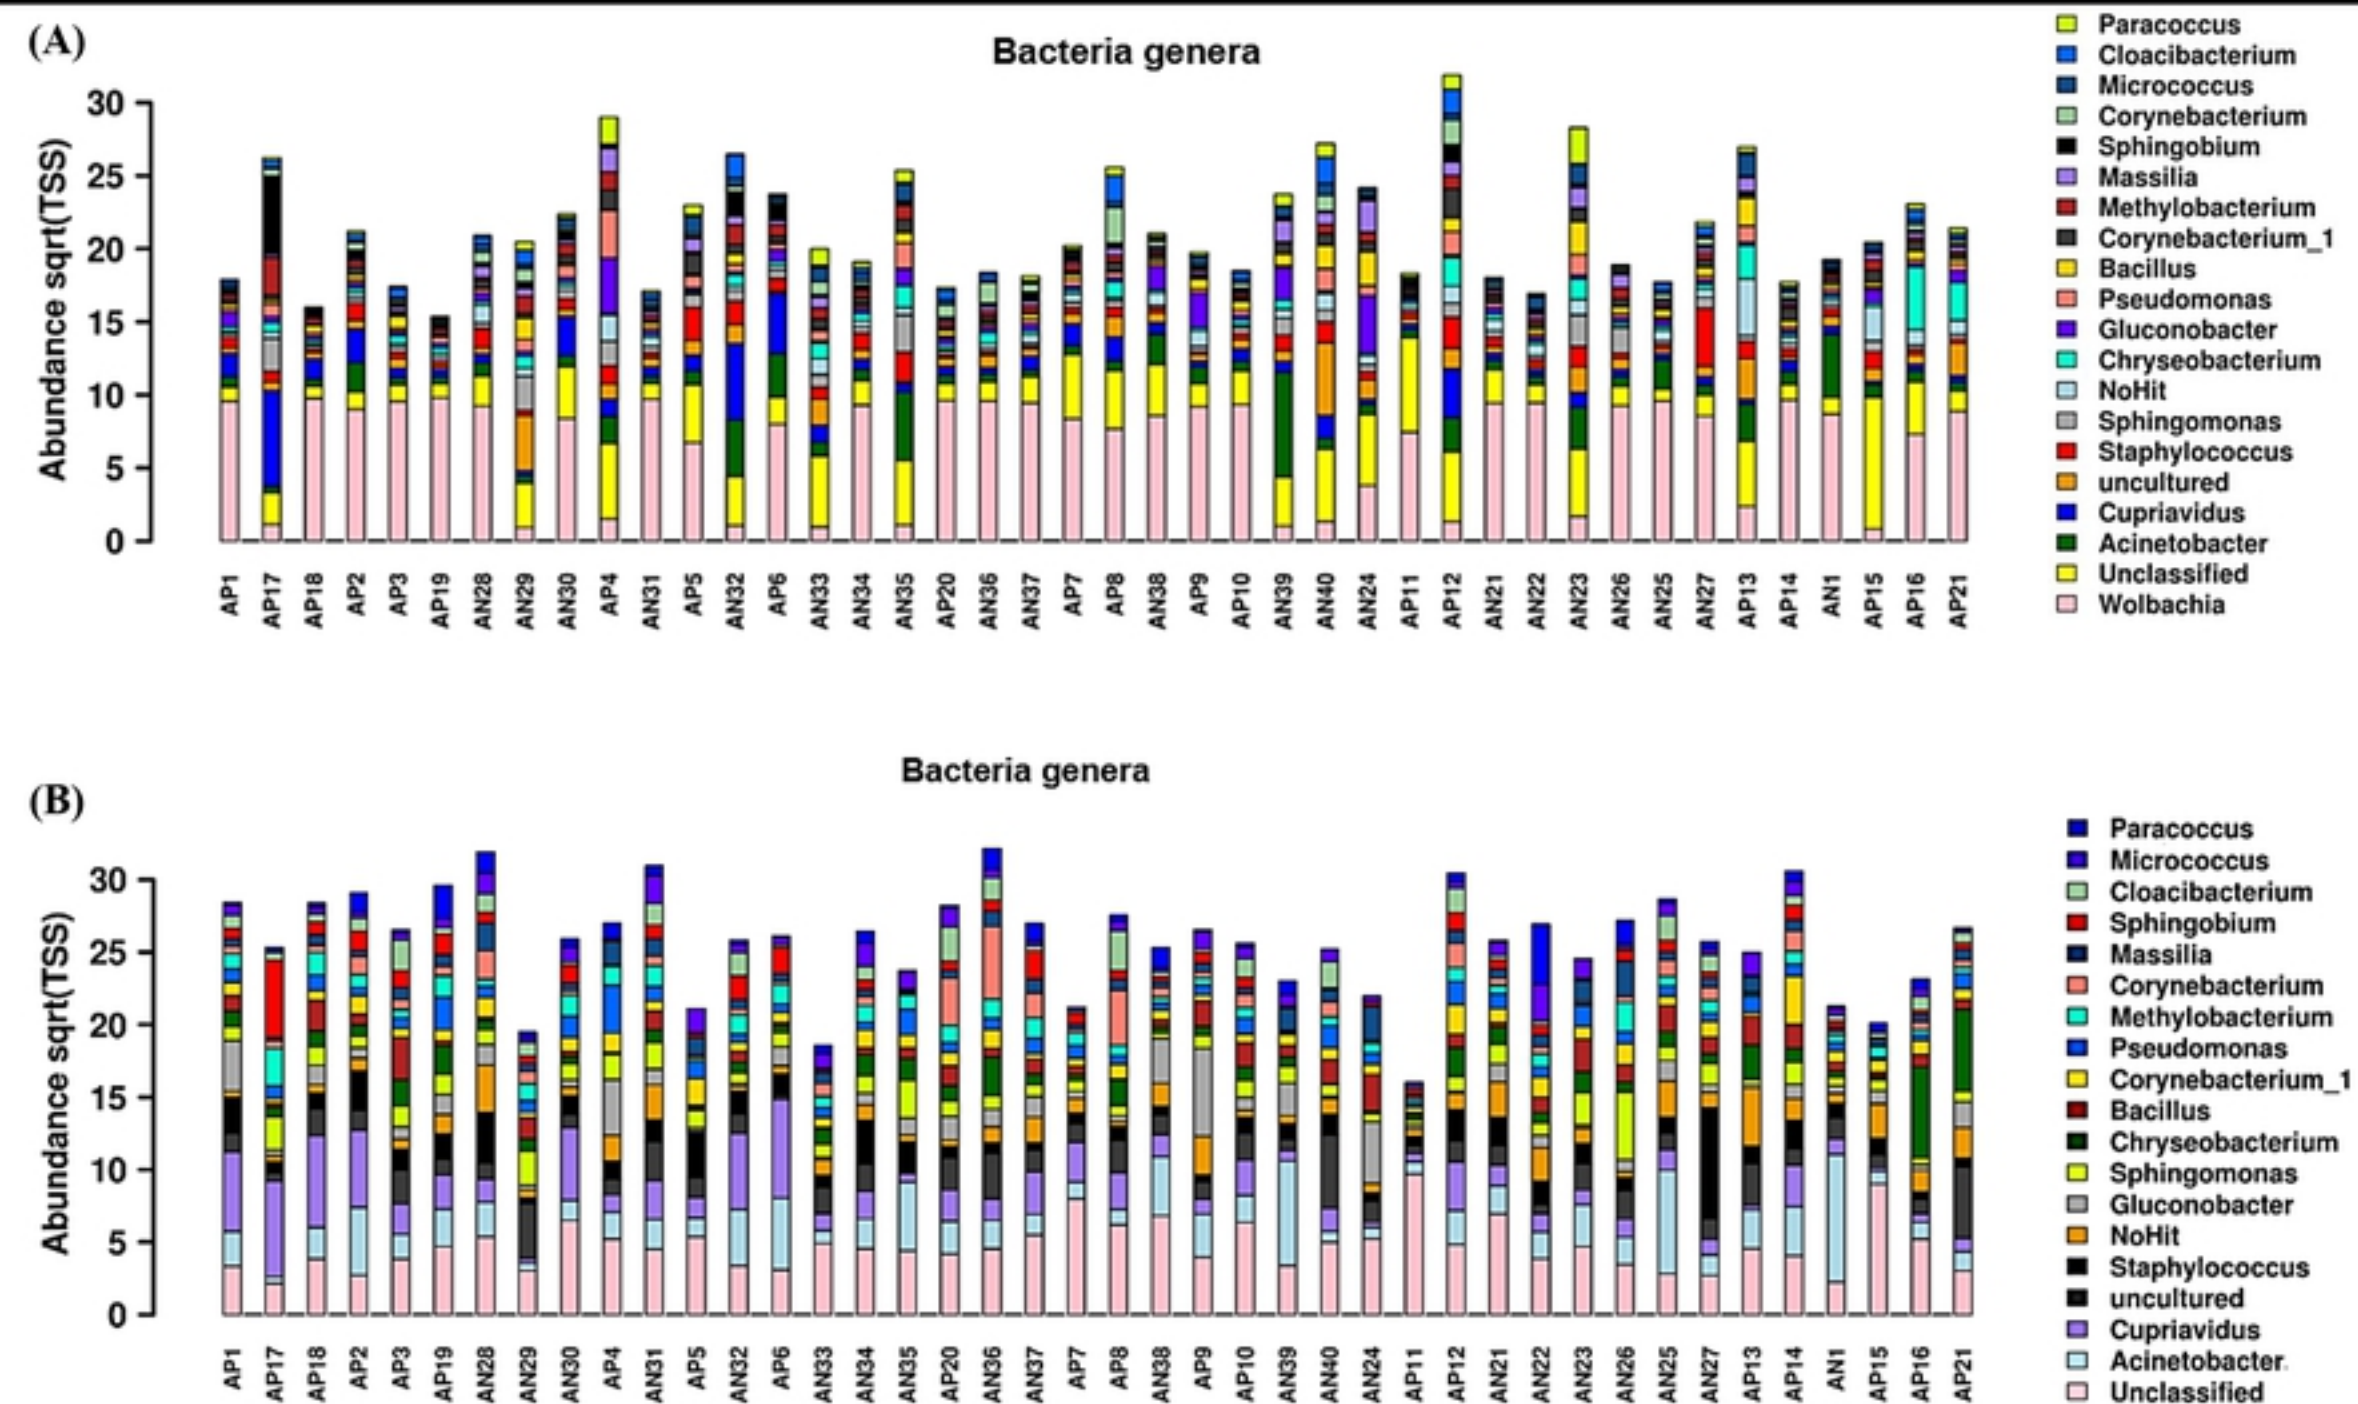

Figure 4

bioRxiv preprint doi: <https://doi.org/10.1101/2020.06.12.148510>; this version posted June 12, 2020. The copyright holder for this preprint (which was not certified by peer review) is the author/funder, who has granted bioRxiv a license to display the preprint in perpetuity. It is made available under aCC-BY 4.0 International license.

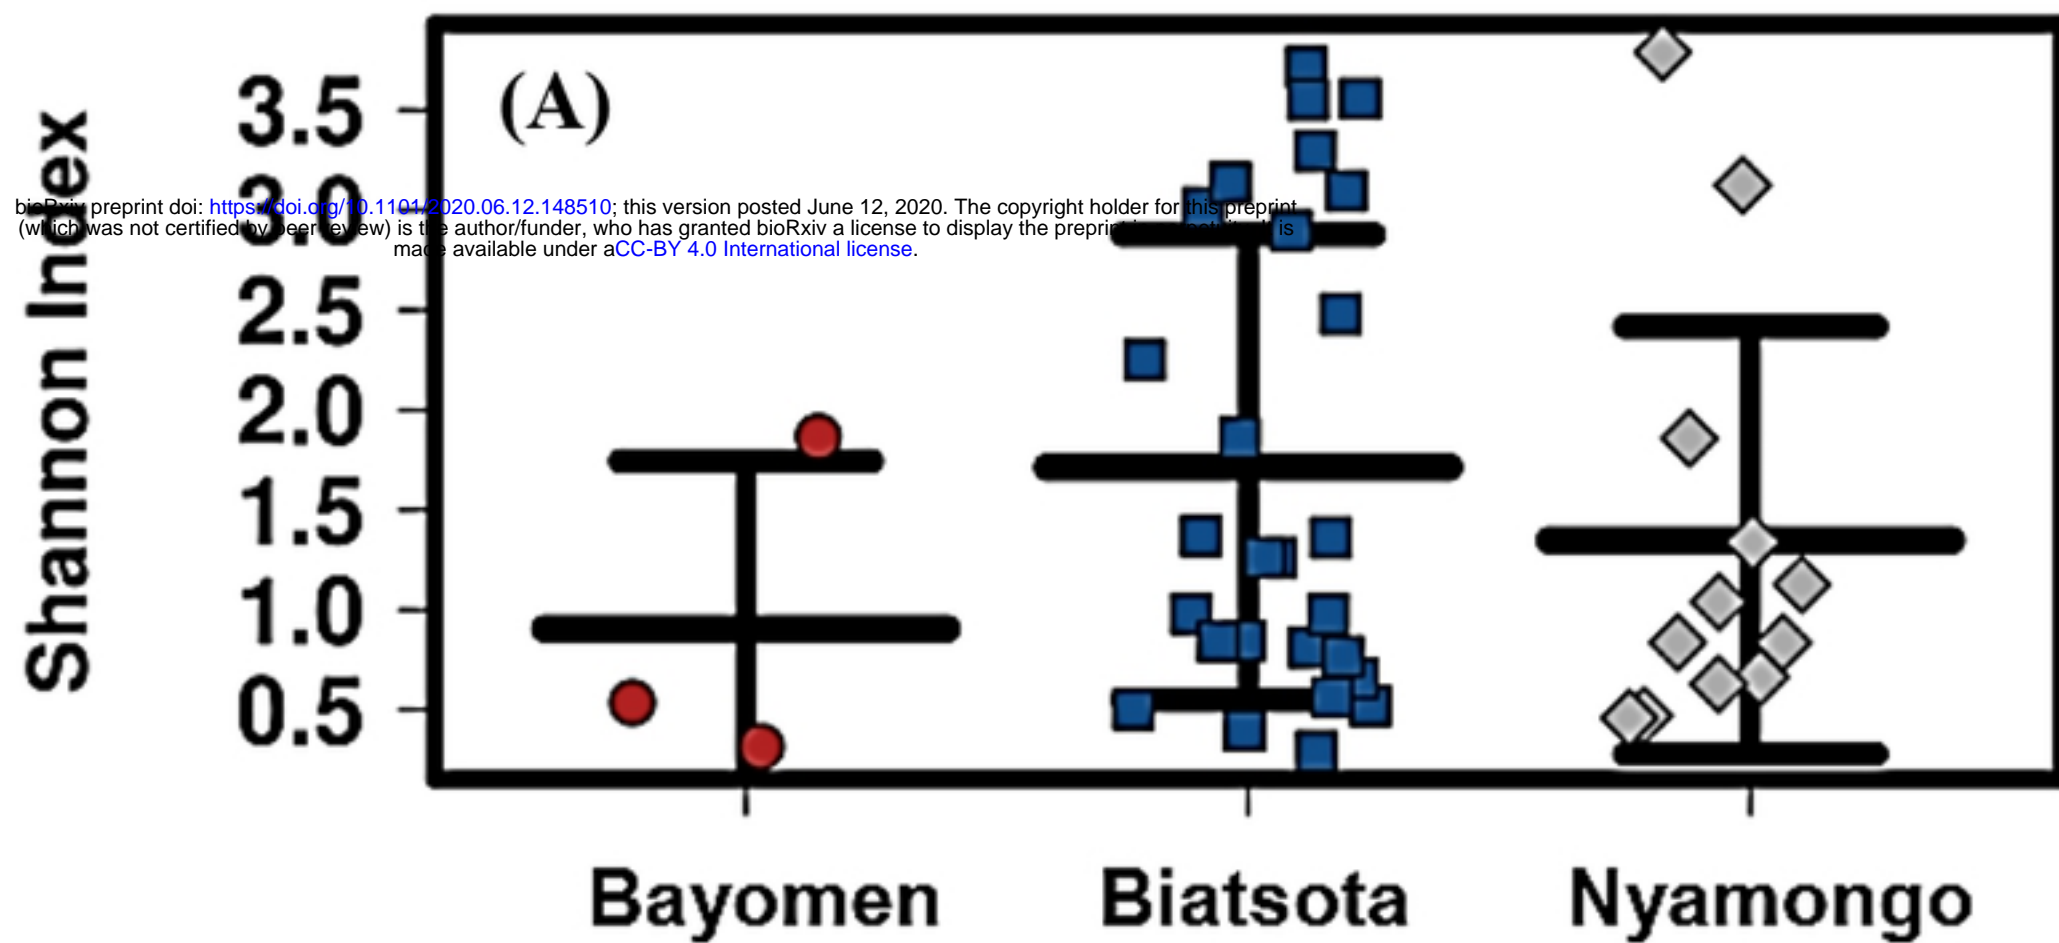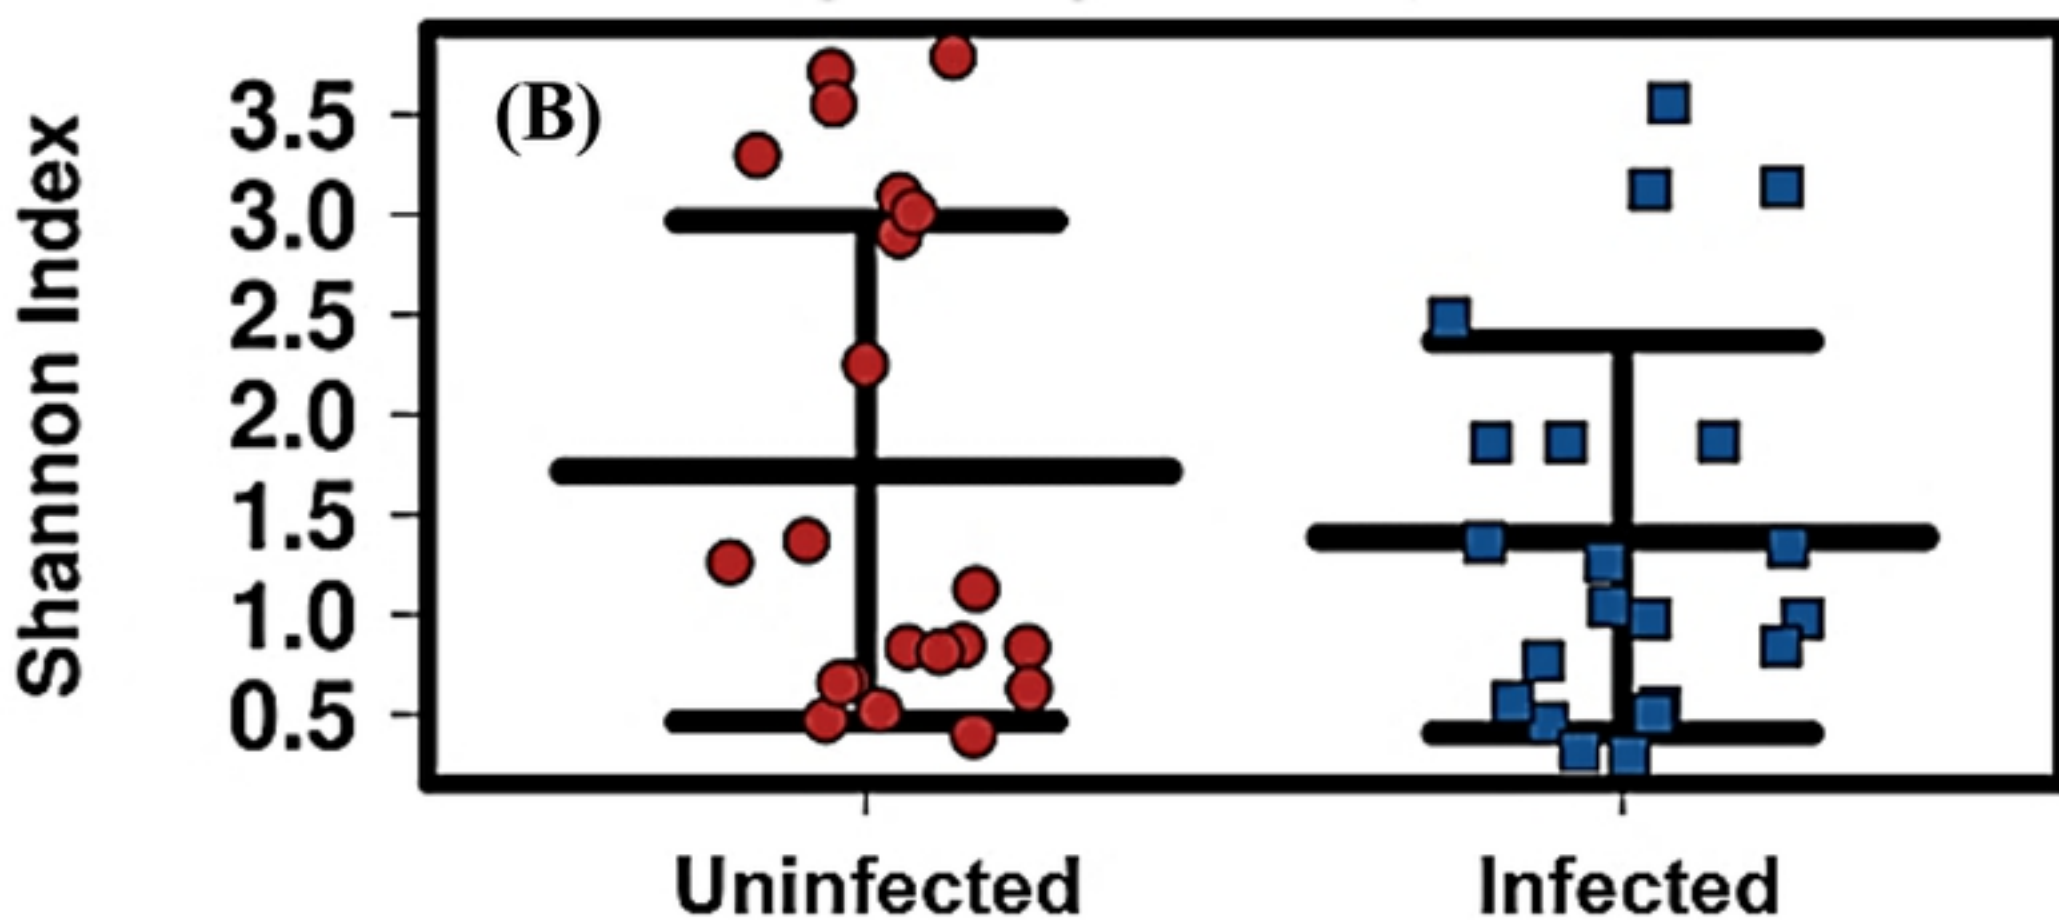

Figure 5

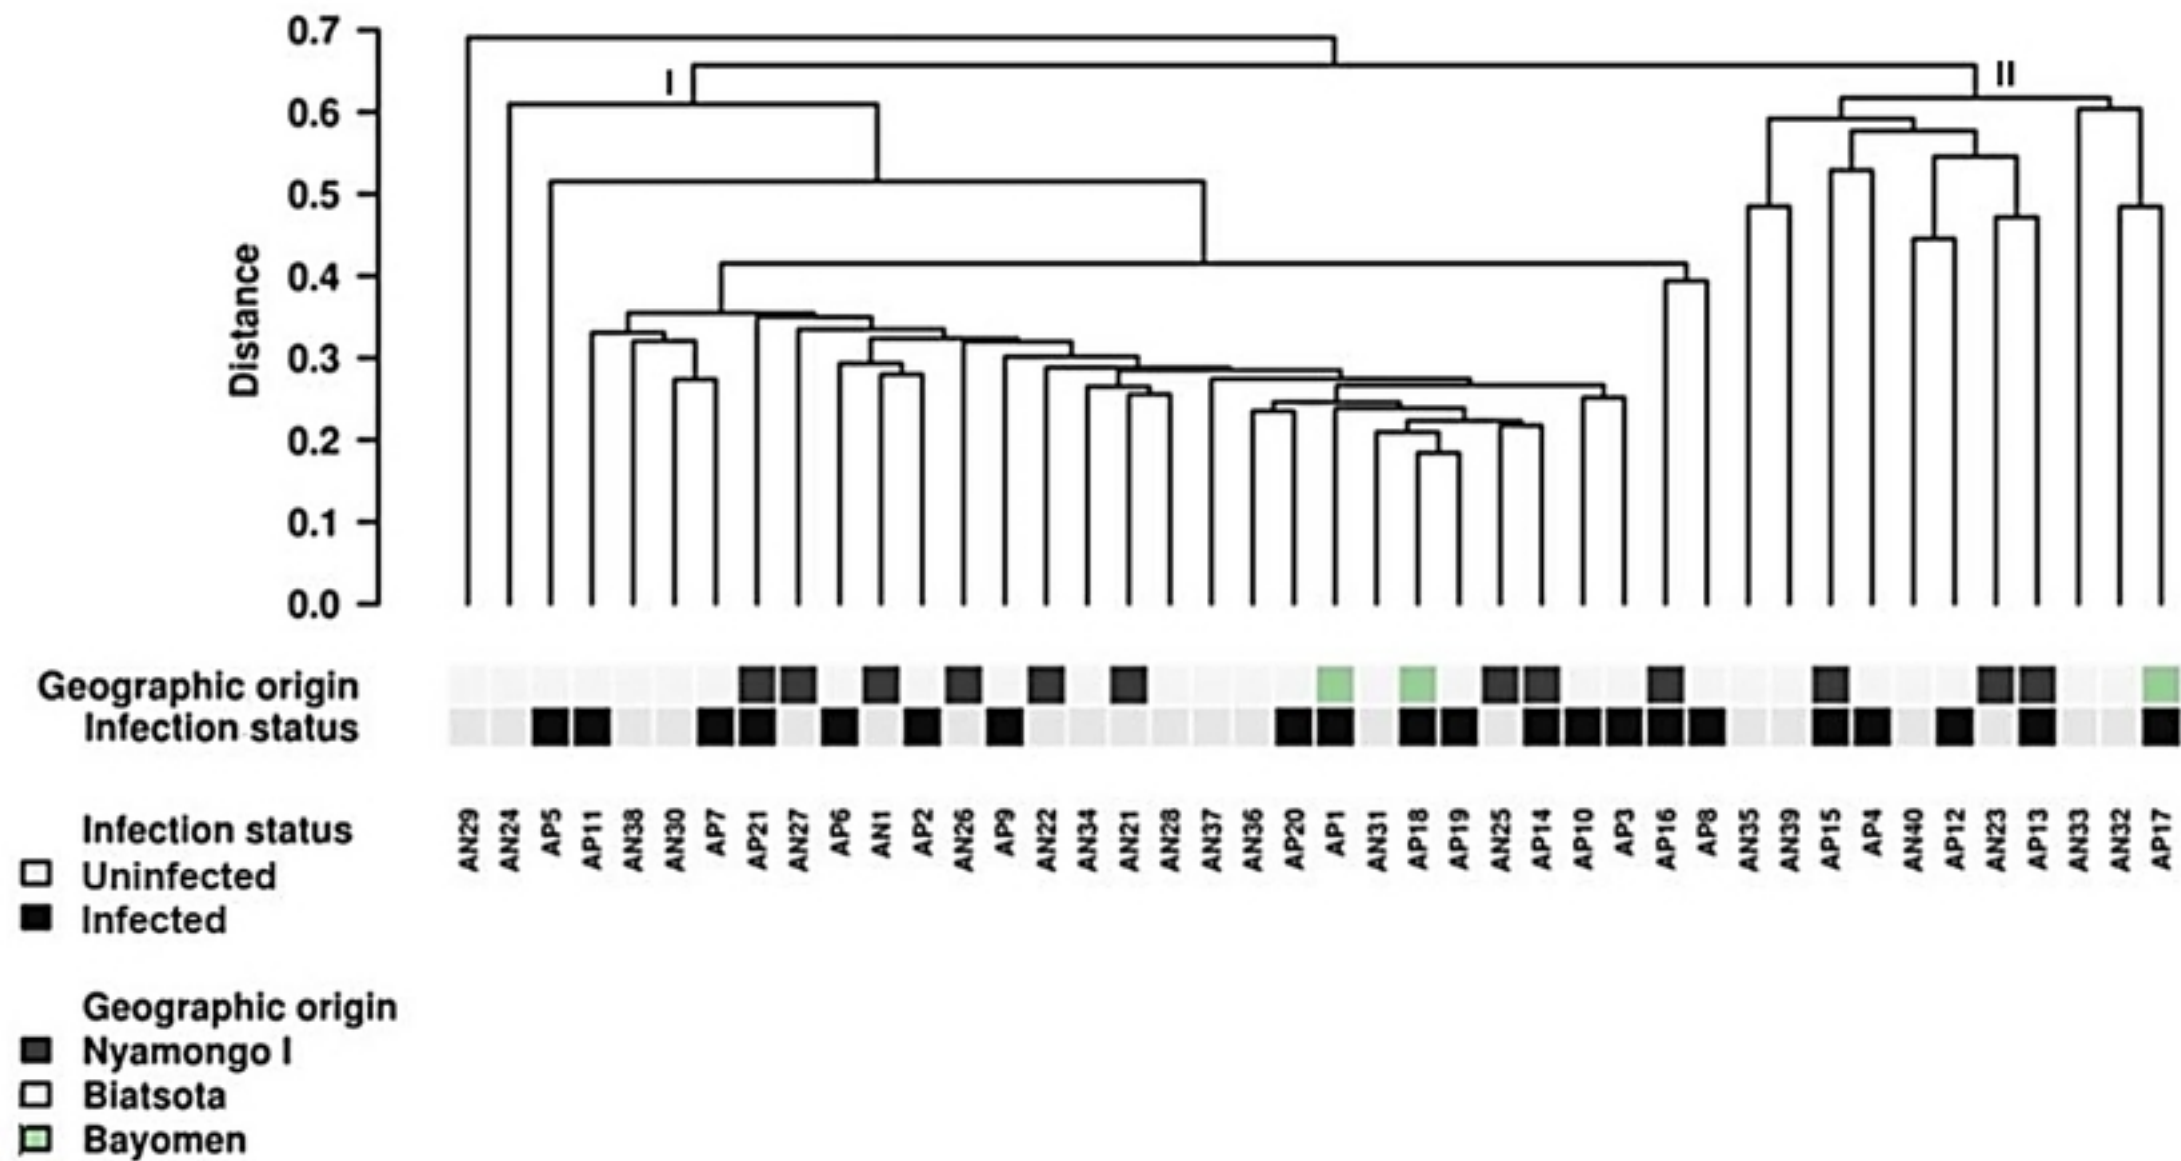

Figure 6
